# Supplementary material for: Building better genome annotations across the tree of life
Source: HighWire-hosted journal article supplement (doi:10.1101/gr.280377.124), 2025-04-15
Supplement: Supplemental_Table_S1.xlsx [file Supplemental_Table_S1.xlsx]

## Sheet: Sheet1
Table S1.Target species, genome versions, and genome size statistics.
Species	Taxonoic group	Genome version	Genome compleasm score	Genome size (Mb)	Scaffold N50	Contig N50
Danaus plexippus	Leipidopterans	v3	0.998	240.099	724680	63961
Bombyx mori	Leipidopterans	ASM15162v1	0.992	406.772	4373199	16617
Heliconius erato demophoon	Leipidopterans	v1	0.996	377.602	10688973	140753
Drosophila melanogaster	Dipterans	Release_6_plus_ISO1_MT	0.999	143.726	25286936	21485538
Drosophila pseudoobscura	Dipterans	UCI_Dpse_MV25	0.999	163.283	32422566	30706867
Drosophila yakuba	Dipterans	Prin_Dyak_Tai18E2_2.1	0.998	147.899	25180761	18744361
Homo sapiens	Mammals	GRCh38.p13	1	3110.72	145138636	51725668
Canis familiaris	Mammals	ROS_Cfam_1.0	0.998	2396.86	64037277	12024593
Mus musculus	Mammals	GRCm39	0.999	2654.62	130530862	46334773
Macaca mulatta	Mammals	GCF_003339765.1_Mmul_10	1	2936.89	145679320	46608966
Gallus gallus	Birds	bGalGal1.mat.broiler.GRCg7b	0.998	1049.95	90861225	18834961
Coturnix japonica	Birds	Coturnix_japonica_2.1	0.997	917.259	82189922	259559
Anas platyrhynchos	Birds	ZJUL1.0	0.998	1184.3	76269206	5679408
Arabidopsis thaliana	Rosids	TAIR10	0.998	119.483	23459830	10898021
Arabidopsis lyrata	Rosids	v1.0	1	183.863	24464547	227391
Brassica oleracea	Rosids	BOL	0.998	445.949	48366697	21629
Capsella rubella	Rosids	Caprub1_0	0.998	129.749	15040190	134357
Zea mays	Monocots	Zm-B73-REFERENCE-NAM-5.0	1	2178.98	226353449	47037903
Brachypodium distachyon	Monocots	3	1	270.875	59130575	21988513
Oryza sativa	Monocots	IRGSP-1.0	1	374.305	29958434	7711345
Setaria italica	Monocots	v2.0	1	401.044	47252588	126273
