# Supplementary material for: Building better genome annotations across the tree of life
Source: HighWire-hosted journal article supplement (doi:10.1101/gr.280377.124), 2025-04-15
Supplement: Supplemental_Table_S2.xlsx [file Supplemental_Table_S2.xlsx]

## Sheet: SRA_accession_ids
Table S2. SRA accession ids for RNA-seq libraries used in this study.
Species	Group	SRA run id	BioProject
Bombyx mori	lepidopterans	ERR2018558	PRJEB21541
Bombyx mori	lepidopterans	ERR2018561	PRJEB21541
Bombyx mori	lepidopterans	ERR2018562	PRJEB21541
Bombyx mori	lepidopterans	ERR2018563	PRJEB21541
Bombyx mori	lepidopterans	ERR2018564	PRJEB21541
Bombyx mori	lepidopterans	ERR2018567	PRJEB21541
Bombyx mori	lepidopterans	ERR2018568	PRJEB21541
Bombyx mori	lepidopterans	SRR12489833	PRJNA658457
Bombyx mori	lepidopterans	SRR12489834	PRJNA658457
Bombyx mori	lepidopterans	SRR12489835	PRJNA658457
Bombyx mori	lepidopterans	SRR1806715	PRJNA275511
Bombyx mori	lepidopterans	SRR1806736	PRJNA275511
Bombyx mori	lepidopterans	SRR1928169	PRJNA279323
Bombyx mori	lepidopterans	SRR5184094	PRJNA360502
Bombyx mori	lepidopterans	SRR5184095	PRJNA360502
Bombyx mori	lepidopterans	SRR5184096	PRJNA360502
Bombyx mori	lepidopterans	SRR5184097	PRJNA360502
Bombyx mori	lepidopterans	SRR5184102	PRJNA360502
Bombyx mori	lepidopterans	SRR5184103	PRJNA360502
Bombyx mori	lepidopterans	SRR5184104	PRJNA360502
Bombyx mori	lepidopterans	SRR5184105	PRJNA360502
Bombyx mori	lepidopterans	SRR6185423	PRJNA414307
Bombyx mori	lepidopterans	SRR6185424	PRJNA414307
Bombyx mori	lepidopterans	SRR6185425	PRJNA414307
Bombyx mori	lepidopterans	SRR6185431	PRJNA414307
Bombyx mori	lepidopterans	SRR6516053	PRJNA429535
Bombyx mori	lepidopterans	SRR6516054	PRJNA429535
Danaus plexippus	lepidopterans	SRR10100549	PRJNA522622
Danaus plexippus	lepidopterans	SRR10100550	PRJNA522622
Danaus plexippus	lepidopterans	SRR10100551	PRJNA522622
Danaus plexippus	lepidopterans	SRR585568	PRJNA72423
Danaus plexippus	lepidopterans	SRR8580831	PRJNA522622
Danaus plexippus	lepidopterans	SRR8580832	PRJNA522622
Danaus plexippus	lepidopterans	SRR8580833	PRJNA522622
Danaus plexippus	lepidopterans	SRR8580834	PRJNA522622
Danaus plexippus	lepidopterans	SRR8580835	PRJNA522622
Danaus plexippus	lepidopterans	SRR8580836	PRJNA522622
Danaus plexippus	lepidopterans	SRR8580837	PRJNA522622
Danaus plexippus	lepidopterans	SRR8580838	PRJNA522622
Danaus plexippus	lepidopterans	SRR8580839	PRJNA522622
Danaus plexippus	lepidopterans	SRR8580840	PRJNA522622
Danaus plexippus	lepidopterans	SRR8580841	PRJNA522622
Danaus plexippus	lepidopterans	SRR8580842	PRJNA522622
Danaus plexippus	lepidopterans	SRR8580843	PRJNA522622
Danaus plexippus	lepidopterans	SRR8580844	PRJNA522622
Danaus plexippus	lepidopterans	SRR8580845	PRJNA522622
Heliconius erato	lepidopterans	SRR9620097	PRJNA552081
Heliconius erato	lepidopterans	SRR9620098	PRJNA552081
Heliconius erato	lepidopterans	SRR9620099	PRJNA552081
Heliconius erato	lepidopterans	SRR9620100	PRJNA552081
Heliconius erato	lepidopterans	SRR9620105	PRJNA552081
Heliconius erato	lepidopterans	SRR9620106	PRJNA552081
Heliconius erato	lepidopterans	SRR9620107	PRJNA552081
Heliconius erato	lepidopterans	SRR9620108	PRJNA552081
Heliconius erato	lepidopterans	SRR9620109	PRJNA552081
Heliconius erato	lepidopterans	SRR9620122	PRJNA552081
Heliconius erato	lepidopterans	SRR9620123	PRJNA552081
Heliconius erato	lepidopterans	SRR9620124	PRJNA552081
Heliconius erato	lepidopterans	SRR9620125	PRJNA552081
Heliconius erato	lepidopterans	SRR9620126	PRJNA552081
Heliconius erato	lepidopterans	SRR9620132	PRJNA552081
Heliconius erato	lepidopterans	SRR9620134	PRJNA552081
Heliconius erato	lepidopterans	SRR9620135	PRJNA552081
Heliconius erato	lepidopterans	SRR9620136	PRJNA552081
Heliconius erato	lepidopterans	SRR9620137	PRJNA552081
Heliconius erato	lepidopterans	SRR9620138	PRJNA552081
Heliconius erato	lepidopterans	SRR9620139	PRJNA552081
Heliconius erato	lepidopterans	SRR9620152	PRJNA552081
Heliconius erato	lepidopterans	SRR9620153	PRJNA552081
Heliconius erato	lepidopterans	SRR9620154	PRJNA552081
Heliconius erato	lepidopterans	SRR9620155	PRJNA552081
Heliconius erato	lepidopterans	SRR9620156	PRJNA552081
Heliconius erato	lepidopterans	SRR9620173	PRJNA552081
Heliconius erato	lepidopterans	SRR9620174	PRJNA552081
Heliconius erato	lepidopterans	SRR9620175	PRJNA552081
Drosophila melanogaster	dipterans	SRR1765780	PRJNA272860
Drosophila melanogaster	dipterans	SRR1767340	PRJNA272860
Drosophila melanogaster	dipterans	SRR1767365	PRJNA272860
Drosophila melanogaster	dipterans	SRR1767366	PRJNA272860
Drosophila melanogaster	dipterans	SRR1767367	PRJNA272860
Drosophila melanogaster	dipterans	SRR1767368	PRJNA272860
Drosophila melanogaster	dipterans	SRR1767387	PRJNA272860
Drosophila melanogaster	dipterans	SRR1767388	PRJNA272860
Drosophila melanogaster	dipterans	SRR1767389	PRJNA272860
Drosophila melanogaster	dipterans	SRR1767390	PRJNA272860
Drosophila melanogaster	dipterans	SRR1767391	PRJNA272860
Drosophila melanogaster	dipterans	SRR1767392	PRJNA272860
Drosophila melanogaster	dipterans	SRR1767393	PRJNA272860
Drosophila melanogaster	dipterans	SRR1767394	PRJNA272860
Drosophila melanogaster	dipterans	SRR1767395	PRJNA272860
Drosophila melanogaster	dipterans	SRR919325	PRJNA205109
Drosophila melanogaster	dipterans	SRR919326	PRJNA205109
Drosophila melanogaster	dipterans	SRR919327	PRJNA205109
Drosophila melanogaster	dipterans	SRR919328	PRJNA205109
Drosophila pseudoobscura	dipterans	ERR1276736	PRJEB12781
Drosophila pseudoobscura	dipterans	ERR1276746	PRJEB12781
Drosophila pseudoobscura	dipterans	ERR1276749	PRJEB12781
Drosophila pseudoobscura	dipterans	ERR1276758	PRJEB12781
Drosophila pseudoobscura	dipterans	ERR1276760	PRJEB12781
Drosophila pseudoobscura	dipterans	ERR1276762	PRJEB12781
Drosophila pseudoobscura	dipterans	ERR1276764	PRJEB12781
Drosophila pseudoobscura	dipterans	ERR1276766	PRJEB12781
Drosophila pseudoobscura	dipterans	ERR1276768	PRJEB12781
Drosophila pseudoobscura	dipterans	ERR1276779	PRJEB12781
Drosophila pseudoobscura	dipterans	ERR1276780	PRJEB12781
Drosophila pseudoobscura	dipterans	ERR1276782	PRJEB12781
Drosophila pseudoobscura	dipterans	ERR1276784	PRJEB12781
Drosophila pseudoobscura	dipterans	ERR1276786	PRJEB12781
Drosophila pseudoobscura	dipterans	ERR1276797	PRJEB12781
Drosophila pseudoobscura	dipterans	ERR1276799	PRJEB12781
Drosophila pseudoobscura	dipterans	ERR1276802	PRJEB12781
Drosophila pseudoobscura	dipterans	ERR1276815	PRJEB12781
Drosophila pseudoobscura	dipterans	ERR1276817	PRJEB12781
Drosophila pseudoobscura	dipterans	ERR1276824	PRJEB12781
Drosophila yakuba	dipterans	SRR1693748	PRJNA196536
Drosophila yakuba	dipterans	SRR1693754	PRJNA196536
Drosophila yakuba	dipterans	SRR1956909	PRJNA280578
Drosophila yakuba	dipterans	SRR1981587	PRJNA281640
Drosophila yakuba	dipterans	SRR9678418	PRJNA553234
Drosophila yakuba	dipterans	SRR9678419	PRJNA553234
Drosophila yakuba	dipterans	SRR9678424	SRR9678424
Drosophila yakuba	dipterans	SRR9678425	SRR9678424
Drosophila yakuba	dipterans	SRR9678426	SRR9678424
Drosophila yakuba	dipterans	SRR9678427	SRR9678424
Drosophila yakuba	dipterans	SRR9678428	SRR9678424
Drosophila yakuba	dipterans	SRR9678429	SRR9678424
Drosophila yakuba	dipterans	SRR9678430	SRR9678424
Drosophila yakuba	dipterans	SRR9678431	SRR9678424
Drosophila yakuba	dipterans	SRR9678432	SRR9678424
Drosophila yakuba	dipterans	SRR9678433	SRR9678424
Drosophila yakuba	dipterans	SRR9678471	SRR9678471
Drosophila yakuba	dipterans	SRR9678474	SRR9678474
Gallus gallus	birds	SRR12432240	PRJNA656654
Gallus gallus	birds	SRR12432241	PRJNA656654
Gallus gallus	birds	SRR12432242	PRJNA656654
Gallus gallus	birds	SRR12432243	PRJNA656654
Gallus gallus	birds	SRR12432244	PRJNA656654
Gallus gallus	birds	SRR12432245	PRJNA656654
Gallus gallus	birds	SRR12432247	PRJNA656654
Gallus gallus	birds	SRR12432248	PRJNA656654
Gallus gallus	birds	SRR12432249	PRJNA656654
Gallus gallus	birds	SRR12432250	PRJNA656654
Gallus gallus	birds	SRR12432251	PRJNA656654
Gallus gallus	birds	SRR12432252	PRJNA656654
Gallus gallus	birds	SRR12432253	PRJNA656654
Gallus gallus	birds	SRR6226212	PRJNA416004
Gallus gallus	birds	SRR6226213	PRJNA416004
Gallus gallus	birds	SRR6226214	PRJNA416004
Gallus gallus	birds	SRR6226215	PRJNA416004
Gallus gallus	birds	SRR6226216	PRJNA416004
Gallus gallus	birds	SRR6226217	PRJNA416004
Gallus gallus	birds	SRR6226218	PRJNA416004
Anas platyrhynchos	birds	SRR10775271	PRJNA597876
Anas platyrhynchos	birds	SRR10775272	PRJNA597876
Anas platyrhynchos	birds	SRR10775273	PRJNA597876
Anas platyrhynchos	birds	SRR11921672	PRJNA636121
Anas platyrhynchos	birds	SRR12702258	PRJNA665337
Anas platyrhynchos	birds	SRR12702260	PRJNA665337
Anas platyrhynchos	birds	SRR12702261	PRJNA665337
Anas platyrhynchos	birds	SRR12702263	PRJNA665337
Anas platyrhynchos	birds	SRR12702264	PRJNA665337
Anas platyrhynchos	birds	SRR12702266	PRJNA665337
Anas platyrhynchos	birds	SRR1295549	PRJNA248056
Anas platyrhynchos	birds	SRR1295588	PRJNA248056
Anas platyrhynchos	birds	SRR16286720	PRJNA770078
Anas platyrhynchos	birds	SRR16286721	PRJNA770078
Anas platyrhynchos	birds	SRR16286723	PRJNA770078
Anas platyrhynchos	birds	SRR16286725	PRJNA770078
Anas platyrhynchos	birds	SRR1777194	PRJNA273367
Anas platyrhynchos	birds	SRR6113923	PRJNA412507
Anas platyrhynchos	birds	SRR6113927	PRJNA412507
Anas platyrhynchos	birds	SRR6113931	PRJNA412507
Coturnix japonica	birds	SRR13170085	PRJNA681638
Coturnix japonica	birds	SRR13170087	PRJNA681638
Coturnix japonica	birds	SRR13170089	PRJNA681638
Coturnix japonica	birds	SRR13170106	PRJNA681638
Coturnix japonica	birds	SRR13170110	PRJNA681638
Coturnix japonica	birds	SRR13170111	PRJNA681638
Coturnix japonica	birds	SRR13170136	PRJNA681638
Coturnix japonica	birds	SRR13170138	PRJNA681638
Coturnix japonica	birds	SRR13170139	PRJNA681638
Coturnix japonica	birds	SRR13170156	PRJNA681638
Coturnix japonica	birds	SRR13170159	PRJNA681638
Coturnix japonica	birds	SRR13170164	PRJNA681638
Coturnix japonica	birds	SRR13170181	PRJNA681638
Coturnix japonica	birds	SRR13170182	PRJNA681638
Coturnix japonica	birds	SRR13170185	PRJNA681638
Coturnix japonica	birds	SRR13170187	PRJNA681638
Coturnix japonica	birds	SRR13170208	SRR13170215
Coturnix japonica	birds	SRR13170211	SRR13170215
Coturnix japonica	birds	SRR13170213	SRR13170215
Coturnix japonica	birds	SRR13170215	SRR13170215
Homo sapiens	mammals	SRR5804411	PRJNA393104
Homo sapiens	mammals	SRR5804412	PRJNA393104
Homo sapiens	mammals	SRR5804413	PRJNA393104
Homo sapiens	mammals	SRR5804414	PRJNA393104
Homo sapiens	mammals	SRR5804415	PRJNA393104
Homo sapiens	mammals	SRR5804416	PRJNA393104
Homo sapiens	mammals	SRR5804417	PRJNA393104
Homo sapiens	mammals	SRR5804418	PRJNA393104
Homo sapiens	mammals	SRR5804419	PRJNA393104
Homo sapiens	mammals	SRR5804420	PRJNA393104
Homo sapiens	mammals	SRR5804421	PRJNA393104
Homo sapiens	mammals	SRR5804422	PRJNA393104
Homo sapiens	mammals	SRR5804423	PRJNA393104
Homo sapiens	mammals	SRR5804430	PRJNA393104
Homo sapiens	mammals	SRR5804431	PRJNA393104
Homo sapiens	mammals	SRR5804448	PRJNA393104
Macaca mulatta	mammals	SRR8752878	PRJNA528034
Macaca mulatta	mammals	SRR8752898	PRJNA528034
Macaca mulatta	mammals	SRR8752899	PRJNA528034
Macaca mulatta	mammals	SRR8752900	PRJNA528034
Macaca mulatta	mammals	SRR8752901	PRJNA528034
Macaca mulatta	mammals	SRR8752902	PRJNA528034
Macaca mulatta	mammals	SRR8752903	PRJNA528034
Macaca mulatta	mammals	SRR8752904	PRJNA528034
Macaca mulatta	mammals	SRR8752907	PRJNA528034
Macaca mulatta	mammals	SRR8752908	PRJNA528034
Macaca mulatta	mammals	SRR8752910	PRJNA528034
Macaca mulatta	mammals	SRR8752911	PRJNA528034
Macaca mulatta	mammals	SRR8752912	PRJNA528034
Macaca mulatta	mammals	SRR8752913	PRJNA528034
Macaca mulatta	mammals	SRR8753179	PRJNA528034
Macaca mulatta	mammals	SRR8753185	PRJNA528034
Canis familiaris	mammals	ERR3417943	PRJEB33381
Canis familiaris	mammals	ERR3417972	PRJEB33381
Canis familiaris	mammals	ERR3417974	PRJEB33381
Canis familiaris	mammals	SRR5889305	PRJNA396033
Canis familiaris	mammals	SRR5889306	PRJNA396033
Canis familiaris	mammals	SRR5889308	PRJNA396033
Canis familiaris	mammals	SRR8474241	PRJNA516470
Canis familiaris	mammals	SRR8996954	PRJNA396033
Canis familiaris	mammals	SRR8996959	PRJNA396033
Canis familiaris	mammals	SRR8996961	PRJNA396033
Canis familiaris	mammals	SRR8996997	PRJNA396033
Canis familiaris	mammals	SRR8996998	PRJNA396033
Canis familiaris	mammals	SRR8996999	PRJNA396033
Canis familiaris	mammals	SRR8997012	PRJNA396033
Canis familiaris	mammals	SRR8997015	PRJNA396033
Canis familiaris	mammals	SRR8997033	PRJNA396033
Canis familiaris	mammals	SRR8997035	PRJNA396033
Mus musculus	mammals	SRR11478643	PRJNA623006
Mus musculus	mammals	SRR11478644	PRJNA623006
Mus musculus	mammals	SRR11478645	PRJNA623006
Mus musculus	mammals	SRR11478646	PRJNA623006
Mus musculus	mammals	SRR11478651	PRJNA623006
Mus musculus	mammals	SRR11478664	PRJNA623006
Mus musculus	mammals	SRR11478665	PRJNA623006
Mus musculus	mammals	SRR11478666	PRJNA623006
Mus musculus	mammals	SRR11478669	PRJNA623006
Mus musculus	mammals	SRR11478670	PRJNA623006
Mus musculus	mammals	SRR11478673	PRJNA623006
Mus musculus	mammals	SRR11478693	PRJNA623006
Mus musculus	mammals	SRR11478694	PRJNA623006
Mus musculus	mammals	SRR11478695	PRJNA623006
Mus musculus	mammals	SRR11478698	PRJNA623006
Mus musculus	mammals	SRR11478699	PRJNA623006
Mus musculus	mammals	SRR11478702	PRJNA623006
Arabidopsis thaliana	rosids	SRR17227558	PRJNA788379
Arabidopsis thaliana	rosids	SRR17227559	PRJNA788379
Arabidopsis thaliana	rosids	SRR17227560	PRJNA788379
Arabidopsis thaliana	rosids	SRR17227561	PRJNA788379
Arabidopsis thaliana	rosids	SRR17227567	PRJNA788379
Arabidopsis thaliana	rosids	SRR17227568	PRJNA788379
Arabidopsis thaliana	rosids	SRR17227569	PRJNA788379
Arabidopsis thaliana	rosids	SRR17227570	PRJNA788379
Arabidopsis thaliana	rosids	SRR17382357	PRJNA793162
Arabidopsis thaliana	rosids	SRR17382358	PRJNA793162
Arabidopsis thaliana	rosids	SRR17382359	PRJNA793162
Arabidopsis thaliana	rosids	SRR17382360	PRJNA793162
Arabidopsis thaliana	rosids	SRR17382361	PRJNA793162
Arabidopsis thaliana	rosids	SRR17382364	PRJNA793162
Arabidopsis thaliana	rosids	SRR17382365	PRJNA793162
Arabidopsis thaliana	rosids	SRR17382367	PRJNA793162
Arabidopsis thaliana	rosids	SRR17382368	PRJNA793162
Arabidopsis thaliana	rosids	SRR17621937	PRJNA753821
Arabidopsis thaliana	rosids	SRR17621938	PRJNA753821
Arabidopsis lyrata	rosids	SRR3020583	PRJNA306157
Arabidopsis lyrata	rosids	SRR3020595	PRJNA306157
Arabidopsis lyrata	rosids	SRR3020598	PRJNA306157
Arabidopsis lyrata	rosids	SRR3993764	PRJNA336053
Arabidopsis lyrata	rosids	SRR6053249	PRJNA408031
Arabidopsis lyrata	rosids	SRR6053251	PRJNA408031
Arabidopsis lyrata	rosids	SRR6053253	PRJNA408031
Arabidopsis lyrata	rosids	SRR6053254	PRJNA408031
Arabidopsis lyrata	rosids	SRR7624702	PRJNA483528
Arabidopsis lyrata	rosids	SRR7624703	PRJNA483528
Arabidopsis lyrata	rosids	SRR7624705	PRJNA483528
Arabidopsis lyrata	rosids	SRR7624726	PRJNA483528
Arabidopsis lyrata	rosids	SRR7624727	PRJNA483528
Arabidopsis lyrata	rosids	SRR7624732	PRJNA483528
Arabidopsis lyrata	rosids	SRR7624733	PRJNA483528
Arabidopsis lyrata	rosids	SRR7624734	PRJNA483528
Arabidopsis lyrata	rosids	SRR7624736	PRJNA483528
Arabidopsis lyrata	rosids	SRR7624738	PRJNA483528
Arabidopsis lyrata	rosids	SRR7624740	PRJNA483528
Arabidopsis lyrata	rosids	SRR7624741	PRJNA483528
Brassica oleracea	rosids	SRR1104813	PRJNA232783
Brassica oleracea	rosids	SRR1213099	PRJNA217459
Brassica oleracea	rosids	SRR14774566	PRJNA736537
Brassica oleracea	rosids	SRR14774570	PRJNA736537
Brassica oleracea	rosids	SRR14774574	PRJNA736537
Brassica oleracea	rosids	SRR17676221	PRJNA798557
Brassica oleracea	rosids	SRR17676222	PRJNA798557
Brassica oleracea	rosids	SRR17676223	PRJNA798557
Brassica oleracea	rosids	SRR630923	PRJNA183713
Brassica oleracea	rosids	SRR630924	PRJNA183713
Brassica oleracea	rosids	SRR630925	PRJNA183713
Brassica oleracea	rosids	SRR630926	PRJNA183713
Brassica oleracea	rosids	SRR630927	PRJNA183713
Brassica oleracea	rosids	SRR630928	PRJNA183713
Capsella rubella	rosids	SRR11470310	PRJNA518905
Capsella rubella	rosids	SRR11470314	PRJNA518905
Capsella rubella	rosids	SRR11470319	PRJNA518905
Capsella rubella	rosids	SRR1944438	PRJNA279584
Capsella rubella	rosids	SRR1944439	PRJNA279584
Capsella rubella	rosids	SRR3102664	PRJNA308856
Capsella rubella	rosids	SRR3102665	PRJNA308856
Capsella rubella	rosids	SRR3102666	PRJNA308856
Capsella rubella	rosids	SRR3102667	PRJNA308856
Capsella rubella	rosids	SRR3993756	PRJNA336053
Capsella rubella	rosids	SRR3993757	PRJNA336053
Capsella rubella	rosids	SRR3993758	PRJNA336053
Capsella rubella	rosids	SRR3993759	PRJNA336053
Capsella rubella	rosids	SRR3993760	PRJNA336053
Zea mays	monocots	SRR15682052	PRJNA759333
Zea mays	monocots	SRR15682053	PRJNA759333
Zea mays	monocots	SRR15682054	PRJNA759333
Zea mays	monocots	SRR15682055	PRJNA759333
Zea mays	monocots	SRR15682056	PRJNA759333
Zea mays	monocots	SRR15682059	PRJNA759333
Zea mays	monocots	SRR15682060	PRJNA759333
Zea mays	monocots	SRR15682061	PRJNA759333
Zea mays	monocots	SRR15682068	PRJNA759333
Zea mays	monocots	SRR15682069	PRJNA759333
Zea mays	monocots	SRR15682070	PRJNA759333
Zea mays	monocots	SRR15682072	PRJNA759333
Zea mays	monocots	SRR15988093	PRJNA764765
Zea mays	monocots	SRR15988094	PRJNA764765
Zea mays	monocots	SRR17674783	PRJNA798863
Zea mays	monocots	SRR17674784	PRJNA798863
Zea mays	monocots	SRR17674785	PRJNA798863
Zea mays	monocots	SRR17674789	PRJNA798863
Zea mays	monocots	SRR17674790	PRJNA798863
Zea mays	monocots	SRR17674791	PRJNA798863
Oryza sativa	monocots	SRR10382018	PRJNA413596
Oryza sativa	monocots	SRR10382020	PRJNA413596
Oryza sativa	monocots	SRR10499802	PRJNA590671
Oryza sativa	monocots	SRR13304724	PRJNA684788
Oryza sativa	monocots	SRR13304725	PRJNA684788
Oryza sativa	monocots	SRR15663632	PRJNA758693
Oryza sativa	monocots	SRR15663633	PRJNA758693
Oryza sativa	monocots	SRR16070292	PRJNA766175
Oryza sativa	monocots	SRR16888331	PRJNA778941
Oryza sativa	monocots	SRR16888332	PRJNA778941
Oryza sativa	monocots	SRR16888334	PRJNA778941
Oryza sativa	monocots	SRR16888335	PRJNA778941
Oryza sativa	monocots	SRR17191339	PRJNA778941
Oryza sativa	monocots	SRR6914160	PRJNA447922
Oryza sativa	monocots	SRR6914161	PRJNA447922
Oryza sativa	monocots	SRR9313767	PRJNA549319
Oryza sativa	monocots	SRR9313768	PRJNA549319
Oryza sativa	monocots	SRR9313770	PRJNA549319
Oryza sativa	monocots	SRR9313771	PRJNA549319
Oryza sativa	monocots	SRR9313772	PRJNA549319
Brachypodium distachyon	monocots	ERR3317427	PRJEB32498
Brachypodium distachyon	monocots	ERR3317428	PRJEB32498
Brachypodium distachyon	monocots	ERR3317429	PRJEB32498
Brachypodium distachyon	monocots	ERR3317430	PRJEB32498
Brachypodium distachyon	monocots	ERR3317431	PRJEB32498
Brachypodium distachyon	monocots	ERR3317433	PRJEB32498
Brachypodium distachyon	monocots	ERR3317434	PRJEB32498
Brachypodium distachyon	monocots	ERR3317435	PRJEB32498
Brachypodium distachyon	monocots	ERR3317436	PRJEB32498
Brachypodium distachyon	monocots	ERR3317441	PRJEB32498
Brachypodium distachyon	monocots	ERR3317442	PRJEB32498
Brachypodium distachyon	monocots	ERR3317443	PRJEB32498
Brachypodium distachyon	monocots	ERR3317444	PRJEB32498
Brachypodium distachyon	monocots	ERR3317445	PRJEB32498
Brachypodium distachyon	monocots	SRR3420430	PRJNA319373
Brachypodium distachyon	monocots	SRR5279889	PRJNA376485
Brachypodium distachyon	monocots	SRR5279890	PRJNA376485
Brachypodium distachyon	monocots	SRR5279891	PRJNA376485
Brachypodium distachyon	monocots	SRR6945012	PRJNA448845
Brachypodium distachyon	monocots	SRR6945013	PRJNA448845
Setaria italica	monocots	ERR2003555	PRJEB21225
Setaria italica	monocots	ERR2003558	PRJEB21225
Setaria italica	monocots	ERR2003561	PRJEB21225
Setaria italica	monocots	ERR2003565	PRJEB21225
Setaria italica	monocots	ERR2282080	PRJEB24803
Setaria italica	monocots	ERR2282081	PRJEB24803
Setaria italica	monocots	ERR2589539	PRJEB26878
Setaria italica	monocots	ERR2589540	PRJEB26878
Setaria italica	monocots	ERR2695647	PRJEB24803
Setaria italica	monocots	ERR3153867	PRJEB31229
Setaria italica	monocots	ERR5862269	PRJEB44706
Setaria italica	monocots	ERR5862271	PRJEB44706
Setaria italica	monocots	ERR5862272	PRJEB44706
Setaria italica	monocots	ERR5862273	PRJEB44706
Setaria italica	monocots	ERR5862274	PRJEB44706
Setaria italica	monocots	ERR5862275	PRJEB44706
Setaria italica	monocots	ERR5862277	PRJEB44706
Setaria italica	monocots	ERR5862278	PRJEB44706
Setaria italica	monocots	ERR5862279	PRJEB44706
Setaria italica	monocots	ERR5862280	PRJEB44706
