# Supplementary material for: Building better genome annotations across the tree of life
Source: HighWire-hosted journal article supplement (doi:10.1101/gr.280377.124), 2025-04-15
Supplement: Supplemental_Table_S3.xlsx [file Supplemental_Table_S3.xlsx]

## Sheet: SummaryStatistics
Table S3: part 1. Summary statistics used to make figures other than those for reference protein blastx coverage.
species	group	method	method_type	genome_compleasm_score	predicted_proteome_compleasm_score	predicted_transcriptome_compleasm_score	number_CDS_NCBI	pcodgenes_wCDS	predicted_number_CDS	intergenic_pcoding_genes	median_CDS_length_NCBI	predicted_median_CDS_length	psauron_score	predprotein_blastp2NCBI_fraction	median_rnaseqalignrate_predicted_transcriptome	median_rnaseqalignrate_transcriptome_testdata	median_rnaseqalignrate_NCBI_transcriptome	median_rnaseqalignrate_CDS_NCBI	median_rnaseqalignrate_predicted_CDS	median_UTR2CDSratio_NCBI	median_UTR2CDSratio_predicted	number_predicted_UTRs_blastx_protein_hit	number_predicted_CDS_wUTRs	PcentTscriptsUtrBlastx
D. melanogaster	dipterans	StrHisat	assembler	0.999	0.838	0.971	30708	8103	26672	244	1410	1911	99.2	0.993	0.877	0.76	0.853	0.548	0.508	0.397	0.797	10447	26495	39.430081147386296
D. melanogaster	dipterans	StrStar	assembler	0.999	0.836	0.967	30708	7956	27322	197	1410	1917	99.2	0.993	0.875	0.76	0.853	0.548	0.508	0.397	0.817	10901	27130	40.18061186877995
D. melanogaster	dipterans	ScalHisat	assembler	0.999	0.864	0.955	30708	11708	23609	457	1410	1197	96.7	0.973	0.875	0.754	0.853	0.548	0.515	0.397	0.76	9598	22472	42.71092915628338
D. melanogaster	dipterans	ScalStar	assembler	0.999	0.856	0.957	30708	13747	22881	418	1410	1233	97.1	0.977	0.869	0.755	0.853	0.548	0.505	0.397	0.774	9181	21481	42.74009589870118
D. melanogaster	dipterans	MakerRnaNoEvm	MAKER	0.999	0.896	0.895	30708	13538	13538	123	1410	825	96.5	0.994	0.379	0.344	0.853	0.548	0.379	0.397	NA	NA	NA	NA
D. melanogaster	dipterans	BrkProt	abinitio	0.999	0.983	0.982	30708	16936	18579	2345	1410	1083	97.3	0.971	0.512	0.47	0.853	0.548	0.512	0.397	NA	NA	NA	NA
D. melanogaster	dipterans	BrkRNA	abinitio	0.999	0.991	0.99	30708	16287	17607	1395	1410	1206	97.6	0.989	0.526	0.47	0.853	0.548	0.526	0.397	NA	NA	NA	NA
D. melanogaster	dipterans	Braker3	abinitio	0.999	0.988	0.987	30708	13792	19217	1086	1410	1389	97.8	0.969	0.529	0.463	0.853	0.548	0.529	0.397	NA	NA	NA	NA
D. melanogaster	dipterans	TOGA	liftover	0.999	0.986	0.985	30708	13256	24210	98	1410	1557	98.4	1	0.529	0.496	0.853	0.548	0.529	0.397	NA	NA	NA	NA
D. melanogaster	dipterans	liftoff	liftover	0.999	0.989	0.998	30708	13665	24642	259	1410	1538	94.3	0.97	0.834	0.853	0.853	0.548	0.542	0.397	NA	NA	NA	NA
D. melanogaster	dipterans	CGPprotein	abinitio	0.999	0.988	0.989	30708	20404	20404	6156	1410	747	73	0.678	0.548	0.525	0.853	0.548	0.548	0.397	NA	NA	NA	NA
D. melanogaster	dipterans	CGPrnaseq	abinitio	0.999	0.979	0.984	30708	26674	26674	12638	1410	462	60	0.503	0.541	0.48	0.853	0.548	0.541	0.397	NA	NA	NA	NA
D. pseudoobscura	dipterans	StrHisat	assembler	0.999	0.825	0.988	26574	12139	34462	2358	1539	1401	96.7	0.965	0.658	NA	0.483	0.29	0.222	0.337	1.11	NA	32954	NA
D. pseudoobscura	dipterans	StrStar	assembler	0.999	0.818	0.984	26574	11305	35696	1763	1539	1452	96.6	0.967	0.673	NA	0.483	0.29	0.222	0.337	1.178	NA	34341	NA
D. pseudoobscura	dipterans	ScalHisat	assembler	0.999	0.831	0.911	26574	12792	27242	1458	1539	888	95.3	0.957	0.646	NA	0.483	0.29	0.214	0.337	0.945	NA	25009	NA
D. pseudoobscura	dipterans	ScalStar	assembler	0.999	0.84	0.927	26574	16447	27986	1652	1539	894	94	0.945	0.662	NA	0.483	0.29	0.217	0.337	1.045	NA	25528	NA
D. pseudoobscura	dipterans	BrkProt	abinitio	0.999	0.964	0.959	26574	18139	19940	3045	1539	1086	97.2	0.979	0.189	NA	0.483	0.29	0.189	0.337	NA	NA	NA	NA
D. pseudoobscura	dipterans	BrkRNA	abinitio	0.999	0.969	0.967	26574	16883	17721	1750	1539	1164	97.7	0.993	0.188	NA	0.483	0.29	0.188	0.337	NA	NA	NA	NA
D. pseudoobscura	dipterans	Braker3	abinitio	0.999	0.985	0.983	26574	15874	20724	2451	1539	1233	96.7	0.95	0.226	NA	0.483	0.29	0.226	0.337	NA	NA	NA	NA
D. pseudoobscura	dipterans	TOGA	liftover	0.999	0.833	0.823	26574	10610	24538	190	1539	1463	98.5	0.995	0.152	NA	0.483	0.29	0.152	0.337	NA	NA	NA	NA
D. pseudoobscura	dipterans	liftoff	liftover	0.999	0.599	0.747	26574	8038	24642	95	1539	1490	67.8	0.67	0.388	NA	0.483	0.29	0.388	0.337	NA	NA	NA	NA
D. pseudoobscura	dipterans	CGPprotein	abinitio	0.999	0.416	0.396	26574	5405	5405	435	1539	1125	93.7	0.931	0.088	NA	0.483	0.29	0.088	0.337	NA	NA	NA	NA
D. pseudoobscura	dipterans	CGPrnaseq	abinitio	0.999	0.419	0.397	26574	12276	12276	5992	1539	456	54.8	0.436	0.097	NA	0.483	0.29	0.097	0.337	NA	NA	NA	NA
D. yakuba	dipterans	StrHisat	assembler	0.998	0.802	0.979	25398	9138	25512	415	1527	1731	98.7	0.991	0.83	NA	0.752	0.429	0.371	0.36	0.968	NA	25309	NA
D. yakuba	dipterans	StrStar	assembler	0.998	0.785	0.978	25398	9025	25914	368	1527	1746	98.6	0.99	0.831	NA	0.752	0.429	0.373	0.36	1.002	NA	25718	NA
D. yakuba	dipterans	ScalHisat	assembler	0.998	0.85	0.949	25398	11563	22341	861	1527	1326	96.8	0.967	0.815	NA	0.752	0.429	0.367	0.36	1.008	NA	21852	NA
D. yakuba	dipterans	ScalStar	assembler	0.998	0.851	0.953	25398	13886	23424	848	1527	1275	96.6	0.969	0.823	NA	0.752	0.429	0.366	0.36	1.013	NA	22823	NA
D. yakuba	dipterans	BrkProt	abinitio	0.998	0.982	0.979	25398	17115	18781	2360	1527	1086	96.9	0.981	0.369	NA	0.752	0.429	0.369	0.36	NA	NA	NA	NA
D. yakuba	dipterans	BrkRNA	abinitio	0.998	0.988	0.988	25398	16636	17886	1583	1527	1179	97.2	0.99	0.38	NA	0.752	0.429	0.38	0.36	NA	NA	NA	NA
D. yakuba	dipterans	Braker3	abinitio	0.998	0.99	0.988	25398	14925	19693	1679	1527	1266	96.7	0.959	0.391	NA	0.752	0.429	0.391	0.36	NA	NA	NA	NA
D. yakuba	dipterans	TOGA	liftover	0.998	0.988	0.986	25398	13396	29537	108	1527	1410	98.4	0.998	0.392	NA	0.752	0.429	0.392	0.36	NA	NA	NA	NA
D. yakuba	dipterans	liftoff	liftover	0.998	0.993	0.997	25398	13562	30184	125	1527	1422	95.2	0.977	0.786	NA	0.752	0.429	0.421	0.36	NA	NA	NA	NA
D. yakuba	dipterans	CGPprotein	abinitio	0.998	0.981	0.98	25398	20219	20219	6094	1527	745	72.8	0.675	0.398	NA	0.752	0.429	0.398	0.36	NA	NA	NA	NA
D. yakuba	dipterans	CGPrnaseq	abinitio	0.998	0.974	0.977	25398	27441	27441	13353	1527	453	58.6	0.488	0.41	NA	0.752	0.429	0.41	0.36	NA	NA	NA	NA
A. lyrata	rosids	StrHisat	assembler	1	0.913	0.988	39160	20904	38044	1196	1095	1080	96.4	0.986	0.909	NA	0.887	0.509	0.49	0.347	0.539	NA	37638	NA
A. lyrata	rosids	StrStar	assembler	1	0.901	0.986	39160	20397	38575	1164	1095	1086	96.4	0.986	0.9	NA	0.887	0.509	0.487	0.347	0.544	NA	38216	NA
A. lyrata	rosids	ScalHisat	assembler	1	0.948	0.979	39160	24591	45663	1405	1095	936	95.5	0.983	0.91	NA	0.887	0.509	0.517	0.347	0.507	NA	44279	NA
A. lyrata	rosids	ScalStar	assembler	1	0.96	0.989	39160	25720	42205	1389	1095	963	95.7	0.983	0.91	NA	0.887	0.509	0.515	0.347	0.51	NA	41044	NA
A. lyrata	rosids	BrkProt	abinitio	1	0.995	0.995	39160	49732	55396	19158	1095	945	95.5	0.992	0.505	NA	0.887	0.509	0.505	0.347	NA	NA	NA	NA
A. lyrata	rosids	BrkRNA	abinitio	1	0.998	0.998	39160	45414	47012	13074	1095	1020	95.5	0.985	0.517	NA	0.887	0.509	0.517	0.347	NA	NA	NA	NA
A. lyrata	rosids	Braker3	abinitio	1	0.991	0.993	39160	39591	45813	12037	1095	945	94.5	0.956	0.505	NA	0.887	0.509	0.505	0.347	NA	NA	NA	NA
A. lyrata	rosids	TOGA	liftover	1	0.988	0.986	39160	24254	44399	775	1095	1089	97.3	0.997	0.484	NA	0.887	0.509	0.484	0.347	NA	NA	NA	NA
A. lyrata	rosids	liftoff	liftover	1	0.96	0.998	39160	25570	45559	1195	1095	1091	86	0.919	0.847	NA	0.887	0.509	0.492	0.347	NA	NA	NA	NA
A. lyrata	rosids	CGPprotein	abinitio	1	0.955	0.951	39160	34102	34102	8021	1095	1020	87.4	0.864	0.563	NA	0.887	0.509	0.563	0.347	NA	NA	NA	NA
A. lyrata	rosids	CGPrnaseq	abinitio	1	0.887	0.887	39160	46965	46965	22418	1095	531	71.3	0.626	0.488	NA	0.887	0.509	0.488	0.347	NA	NA	NA	NA
A. thaliana	rosids	StrHisat	assembler	0.998	0.894	0.988	48265	17763	29447	239	1084.5	1176	97.9	0.996	0.929	0.895	0.936	0.57	0.546	0.39	0.481	9845	29271	33.63397219090567
A. thaliana	rosids	StrStar	assembler	0.998	0.896	0.991	48265	17662	29738	239	1084.5	1185	98	0.996	0.931	0.896	0.936	0.57	0.546	0.39	0.479	9879	29563	33.41677096370463
A. thaliana	rosids	ScalHisat	assembler	0.998	0.922	0.96	48265	20521	36876	326	1084.5	1026	96.5	0.992	0.936	0.903	0.936	0.57	0.563	0.39	0.517	13410	36245	36.998206649192994
A. thaliana	rosids	ScalStar	assembler	0.998	0.925	0.965	48265	21722	34612	368	1084.5	1050	97	0.993	0.932	0.901	0.936	0.57	0.562	0.39	0.489	11686	33838	34.53513801052072
A. thaliana	rosids	BrkProt	abinitio	0.998	0.998	0.998	48265	34213	37374	7271	1084.5	1002	96	0.992	0.584	0.523	0.936	0.57	0.584	0.39	NA	NA	NA	NA
A. thaliana	rosids	BrkRNA	abinitio	0.998	0.995	0.995	48265	34509	35684	5941	1084.5	1053	96.5	0.993	0.566	0.52	0.936	0.57	0.566	0.39	NA	NA	NA	NA
A. thaliana	rosids	Braker3	abinitio	0.998	0.995	0.995	48265	29121	33694	4023	1084.5	1035	96	0.975	0.575	0.516	0.936	0.57	0.575	0.39	NA	NA	NA	NA
A. thaliana	rosids	MakerRnaNoEvm	MAKER	0.998	0.579	0.558	48265	11847	11847	457	1084.5	1083	96.2	0.996	0.311	0.258	0.936	0.57	0.311	0.39	NA	NA	NA	NA
A. thaliana	rosids	TOGA	liftover	0.998	0.984	0.984	48265	23285	32373	378	1084.5	1116	97.6	0.999	0.548	0.495	0.936	0.57	0.548	0.39	NA	NA	NA	NA
A. thaliana	rosids	liftoff	liftover	0.998	0.967	0.998	48265	25637	33826	1127	1084.5	1113	88.2	0.936	0.872	0.822	0.936	0.57	0.556	0.39	NA	NA	NA	NA
A. thaliana	rosids	CGPprotein	abinitio	0.998	0.979	0.981	48265	32541	32541	6707	1084.5	939	85.4	0.838	0.624	0.575	0.936	0.57	0.624	0.39	NA	NA	NA	NA
A. thaliana	rosids	CGPrnaseq	abinitio	0.998	0.92	0.915	48265	43805	43805	19327	1084.5	504	69.9	0.604	0.558	0.518	0.936	0.57	0.558	0.39	NA	NA	NA	NA
B. oleracea	rosids	StrHisat	assembler	0.998	0.958	0.998	56687	34841	54837	4384	1041	948	95	0.977	0.848	NA	0.826	0.573	0.578	0.243	0.403	NA	52148	NA
B. oleracea	rosids	StrStar	assembler	0.998	0.96	0.995	56687	34246	57266	4410	1041	974	95.2	0.977	0.85	NA	0.826	0.573	0.574	0.243	0.422	NA	55384	NA
B. oleracea	rosids	ScalHisat	assembler	0.998	0.976	0.995	56687	35365	70650	3606	1041	822	94.7	0.979	0.84	NA	0.826	0.573	0.571	0.243	0.473	NA	66297	NA
B. oleracea	rosids	ScalStar	assembler	0.998	0.972	0.991	56687	37422	65088	3874	1041	858	94.5	0.977	0.845	NA	0.826	0.573	0.573	0.243	0.496	NA	61895	NA
B. oleracea	rosids	BrkProt	abinitio	0.998	NA	NA	56687	NA	NA	NA	1041	NA	NA	NA	NA	NA	0.826	0.573	NA	0.243	NA	NA	NA	NA
B. oleracea	rosids	BrkRNA	abinitio	0.998	0.995	0.995	56687	116461	119927	66590	1041	768	93	0.981	0.577	NA	0.826	0.573	0.577	0.243	NA	NA	NA	NA
B. oleracea	rosids	Braker3	abinitio	0.998	0.995	0.995	56687	58409	66200	20716	1041	816	94.8	0.976	0.569	NA	0.826	0.573	0.569	0.243	NA	NA	NA	NA
B. oleracea	rosids	TOGA	liftover	0.998	0.859	0.854	56687	23811	46164	1465	1041	1077	97.7	0.996	0.419	NA	0.826	0.573	0.419	0.243	NA	NA	NA	NA
B. oleracea	rosids	liftoff	liftover	0.998	0.835	0.991	56687	21625	40232	1267	1041	1082	73.9	0.812	0.522	NA	0.826	0.573	0.415	0.243	NA	NA	NA	NA
B. oleracea	rosids	CGPprotein	abinitio	0.998	0.544	0.52	56687	24771	24771	8891	1041	1062	92.3	0.928	0.313	NA	0.826	0.573	0.313	0.243	NA	NA	NA	NA
B. oleracea	rosids	CGPrnaseq	abinitio	0.998	0.496	0.473	56687	37349	37349	21536	1041	597	78.2	0.718	0.274	NA	0.826	0.573	0.274	0.243	NA	NA	NA	NA
C. rubella	rosids	StrHisat	assembler	0.998	0.918	0.998	34126	19662	34040	535	1473	1113	97.5	0.992	0.87	NA	0.848	0.564	0.529	0.251	0.475	NA	33356	NA
C. rubella	rosids	StrStar	assembler	0.998	0.922	0.995	34126	19481	34722	557	1473	1119	97.5	0.992	0.877	NA	0.848	0.564	0.527	0.251	0.479	NA	34088	NA
C. rubella	rosids	ScalHisat	assembler	0.998	0.908	0.972	34126	22809	38748	745	1473	966	96.1	0.985	0.877	NA	0.848	0.564	0.54	0.251	0.606	NA	37655	NA
C. rubella	rosids	ScalStar	assembler	0.998	0.887	0.965	34126	28037	39203	1053	1473	969	95.6	0.982	0.882	NA	0.848	0.564	0.547	0.251	0.625	NA	38009	NA
C. rubella	rosids	BrkProt	abinitio	0.998	0.998	0.998	34126	34130	37085	7329	1473	1026	96.3	0.995	0.573	NA	0.848	0.564	0.573	0.251	NA	NA	NA	NA
C. rubella	rosids	BrkRNA	abinitio	0.998	0.995	0.995	34126	34948	36027	6180	1473	1077	96.4	0.989	0.573	NA	0.848	0.564	0.573	0.251	NA	NA	NA	NA
C. rubella	rosids	Braker3	abinitio	0.998	0.988	0.988	34126	29571	34511	4352	1473	1047	95.7	0.971	0.57	NA	0.848	0.564	0.57	0.251	NA	NA	NA	NA
C. rubella	rosids	TOGA	liftover	0.998	0.986	0.981	34126	21709	40339	411	1473	1122	97.7	0.998	0.525	NA	0.848	0.564	0.525	0.251	NA	NA	NA	NA
C. rubella	rosids	liftoff	liftover	0.998	0.929	0.998	34126	23450	42716	771	1473	1109	84.3	0.894	0.793	NA	0.848	0.564	0.535	0.251	NA	NA	NA	NA
C. rubella	rosids	CGPprotein	abinitio	0.998	0.932	0.929	34126	27331	27331	3952	1473	1060	89	0.885	0.558	NA	0.848	0.564	0.558	0.251	NA	NA	NA	NA
C. rubella	rosids	CGPrnaseq	abinitio	0.998	0.88	0.878	34126	37443	37443	15336	1473	576	72.4	0.63	0.508	NA	0.848	0.564	0.508	0.251	NA	NA	NA	NA
A. platyrhynchos	birds	StrHisat	assembler	0.998	0.897	0.932	45273	15335	50112	1710	1590	1395	95	0.965	0.746	NA	0.661	0.392	0.338	0.865	1.37	NA	48999	NA
A. platyrhynchos	birds	StrStar	assembler	0.998	0.896	0.934	45273	14949	53567	1632	1590	1413	95	0.964	0.747	NA	0.661	0.392	0.334	0.865	1.45	NA	52738	NA
A. platyrhynchos	birds	ScalHisat	assembler	0.998	0.897	0.94	45273	21516	58011	3885	1590	915	85.8	0.884	0.748	NA	0.661	0.392	0.344	0.865	1.498	NA	55116	NA
A. platyrhynchos	birds	ScalStar	assembler	0.998	0.904	0.943	45273	22178	54186	4341	1590	951	85.6	0.877	0.75	NA	0.661	0.392	0.342	0.865	1.688	NA	51992	NA
A. platyrhynchos	birds	BrkProt	abinitio	0.998	0.287	0.282	45273	11575	12643	1208	1590	984	81.5	0.976	0.133	NA	0.661	0.392	0.133	0.865	NA	NA	NA	NA
A. platyrhynchos	birds	BrkRNA	abinitio	0.998	0.559	0.558	45273	18936	20315	1658	1590	1011	81.9	0.924	0.212	NA	0.661	0.392	0.212	0.865	NA	NA	NA	NA
A. platyrhynchos	birds	Braker3	abinitio	0.998	0.915	0.914	45273	18696	28501	3956	1590	1296	94.7	0.944	0.293	NA	0.661	0.392	0.293	0.865	NA	NA	NA	NA
A. platyrhynchos	birds	TOGA	liftover	0.998	0.98	0.98	45273	15178	56789	460	1590	1617	98.5	0.998	0.298	NA	0.661	0.392	0.298	0.865	NA	NA	NA	NA
A. platyrhynchos	birds	liftoff	liftover	0.998	0.794	0.974	45273	15479	54612	709	1590	1644	76.6	0.845	0.63	NA	0.661	0.392	0.364	0.865	NA	NA	NA	NA
A. platyrhynchos	birds	CGPprotein	abinitio	0.998	0.763	0.759	45273	16933	16933	3757	1590	915	80.5	0.771	0.226	NA	0.661	0.392	0.226	0.865	NA	NA	NA	NA
A. platyrhynchos	birds	CGPrnaseq	abinitio	0.998	0.754	0.751	45273	50278	50278	36441	1590	378	41.3	0.286	0.269	NA	0.661	0.392	0.269	0.865	NA	NA	NA	NA
C. japonica	birds	StrHisat	assembler	0.997	0.825	0.861	40934	14084	37962	1564	1629	1407	94	0.955	0.722	NA	0.586	0.33	0.256	0.736	1.339	NA	36963	NA
C. japonica	birds	StrStar	assembler	0.997	0.822	0.862	40934	13633	40690	1547	1629	1395	92.8	0.944	0.727	NA	0.586	0.33	0.257	0.736	1.375	NA	39618	NA
C. japonica	birds	ScalHisat	assembler	0.997	0.846	0.885	40934	20572	51626	3894	1629	900	84.6	0.871	0.726	NA	0.586	0.33	0.255	0.736	1.542	NA	49004	NA
C. japonica	birds	ScalStar	assembler	0.997	0.854	0.897	40934	20937	51070	4381	1629	909	83.7	0.859	0.733	NA	0.586	0.33	0.259	0.736	1.687	NA	48807	NA
C. japonica	birds	BrkProt	abinitio	0.997	0.444	0.439	40934	13881	15035	1208	1629	837	87	0.978	0.143	NA	0.586	0.33	0.143	0.736	NA	NA	NA	NA
C. japonica	birds	BrkRNA	abinitio	0.997	0.815	0.813	40934	18906	22234	2648	1629	1251	86.3	0.917	0.231	NA	0.586	0.33	0.231	0.736	NA	NA	NA	NA
C. japonica	birds	Braker3	abinitio	0.997	0.934	0.934	40934	17082	25070	2475	1629	1368	93.1	0.937	0.242	NA	0.586	0.33	0.242	0.736	NA	NA	NA	NA
C. japonica	birds	TOGA	liftover	0.997	0.988	0.988	40934	15190	56191	465	1629	1641	97.9	0.998	0.246	NA	0.586	0.33	0.246	0.736	NA	NA	NA	NA
C. japonica	birds	liftoff	liftover	0.997	0.944	0.993	40934	16116	55999	1016	1629	1641	87.3	0.931	0.639	NA	0.586	0.33	0.325	0.736	NA	NA	NA	NA
C. japonica	birds	CGPprotein	abinitio	0.997	0.933	0.932	40934	37692	37692	20234	1629	300	52.2	0.437	0.221	NA	0.586	0.33	0.221	0.736	NA	NA	NA	NA
C. japonica	birds	CGPrnaseq	abinitio	0.997	0.914	0.914	40934	72120	72120	55027	1629	330	36.6	0.239	0.26	NA	0.586	0.33	0.26	0.736	NA	NA	NA	NA
G. gallus	birds	StrHisat	assembler	0.998	0.842	0.867	59322	12688	40007	755	1614	1473	94.8	0.966	0.819	0.813	0.676	0.382	0.304	0.812	1.428	16042	39690	40.418241370622326
G. gallus	birds	StrStar	assembler	0.998	0.839	0.866	59322	12560	40389	757	1614	1473	93.9	0.958	0.817	0.812	0.676	0.382	0.301	0.812	1.447	16014	40035	40
G. gallus	birds	ScalHisat	assembler	0.998	0.888	0.91	59322	16550	47700	1991	1614	1068	89.5	0.92	0.816	0.811	0.676	0.382	0.302	0.812	1.397	18418	46280	39.796888504753674
G. gallus	birds	ScalStar	assembler	0.998	0.892	0.915	59322	16556	46043	1960	1614	1065	89.3	0.918	0.815	0.809	0.676	0.382	0.3	0.812	1.493	18059	44752	40.353503754022164
G. gallus	birds	BrkProt	abinitio	0.998	0.385	0.376	59322	14671	16116	1414	1614	844	84.2	0.971	0.155	0.156	0.676	0.382	0.155	0.812	NA	NA	NA	NA
G. gallus	birds	BrkRNA	abinitio	0.998	0.648	0.644	59322	19069	21030	1641	1614	1104	82.5	0.938	0.223	0.216	0.676	0.382	0.223	0.812	NA	NA	NA	NA
G. gallus	birds	Braker3	abinitio	0.998	0.952	0.951	59322	18680	27661	2885	1614	1350	94.1	0.95	0.288	0.272	0.676	0.382	0.288	0.812	NA	NA	NA	NA
G. gallus	birds	MakerRnaNoEvm	MAKER	0.998	0.875	0.874	59322	17023	17023	979	1614	1125	94.6	0.99	0.229	0.217	0.676	0.382	0.229	0.812	NA	NA	NA	NA
G. gallus	birds	TOGA	liftover	0.998	0.984	0.983	59322	15403	40672	285	1614	1627	98.5	1	0.28	0.263	0.676	0.382	0.28	0.812	NA	NA	NA	NA
G. gallus	birds	liftoff	liftover	0.998	0.928	0.991	59322	15471	40146	326	1614	1652	90.2	0.94	0.712	0.705	0.676	0.382	0.37	0.812	NA	NA	NA	NA
G. gallus	birds	CGPprotein	abinitio	0.998	0.962	0.961	59322	39649	39649	20754	1614	309	53	0.45	0.271	0.256	0.676	0.382	0.271	0.812	NA	NA	NA	NA
G. gallus	birds	CGPrnaseq	abinitio	0.998	0.944	0.944	59322	81355	81355	62742	1614	336	35.9	0.233	0.345	0.331	0.676	0.382	0.345	0.812	NA	NA	NA	NA
Z. mays	monocots	StrHisat	assembler	1	0.991	0.998	57578	29750	63175	5078	1128	978	88	0.935	0.783	0.734	0.761	0.496	0.515	0.463	0.81	26839	61724	43.48227593804679
Z. mays	monocots	StrStar	assembler	1	0.988	0.998	57578	29853	65876	5213	1128	987	88.2	0.935	0.783	0.736	0.761	0.496	0.434	0.463	0.853	28667	64610	44.36929267915183
Z. mays	monocots	ScalHisat	assembler	1	0.986	0.998	57578	36270	78481	6405	1128	822	84.7	0.919	0.785	0.735	0.761	0.496	0.518	0.463	0.92	35030	76214	45.96268402130842
Z. mays	monocots	ScalStar	assembler	1	0.984	0.998	57578	36824	76732	6545	1128	843	85.8	0.922	0.787	0.739	0.761	0.496	0.521	0.463	0.91	34281	74539	45.9907
Z. mays	monocots	BrkProt	abinitio	1	0.765	0.755	57578	80107	87253	49309	1128	639	86.2	0.916	0.408	0.315	0.761	0.496	0.408	0.463	NA	NA	NA	NA
Z. mays	monocots	BrkRNA	abinitio	1	0.976	0.976	57578	89237	95414	50954	1128	708	84.4	0.941	0.485	0.372	0.761	0.496	0.485	0.463	NA	NA	NA	NA
Z. mays	monocots	Braker3	abinitio	1	0.995	0.995	57578	83752	95432	53813	1128	642	93.1	0.917	0.499	0.371	0.761	0.496	0.499	0.463	NA	NA	NA	NA
Z. mays	monocots	MakerRnaNoEvm	MAKER	1	0.934	0.929	57578	26865	26865	4125	1128	1137	96.3	0.994	0.414	0.3	0.761	0.496	0.412	0.463	NA	NA	NA	NA
Z. mays	monocots	TOGA	liftover	1	0.915	0.915	57578	21342	29140	1529	1128	1137	97.5	0.994	0.381	0.256	0.761	0.496	0.381	0.463	NA	NA	NA	NA
Z. mays	monocots	liftoff	liftover	1	0.819	0.969	57578	20780	26886	1305	1128	1103	76.8	0.836	0.489	0.436	0.761	0.496	0.384	0.463	NA	NA	NA	NA
Z. mays	monocots	CGPprotein	abinitio	1	0.694	0.696	57578	22190	22190	5762	1128	840	89.6	0.921	0.284	0.201	0.761	0.496	0.284	0.463	NA	NA	NA	NA
Z. mays	monocots	CGPrnaseq	abinitio	1	0.682	0.689	57578	40162	40162	21299	1128	537	64.1	0.601	0.314	0.235	0.761	0.496	0.314	0.463	NA	NA	NA	NA
B. distachyon	monocots	StrHisat	assembler	1	0.981	0.991	37892	24235	45783	5404	1206	996	87.2	0.89	0.889	NA	0.818	0.498	0.469	0.431	0.975	NA	45358	NA
B. distachyon	monocots	StrStar	assembler	1	0.974	0.995	37892	23745	47383	5106	1206	1005	87.5	0.895	0.886	NA	0.818	0.498	0.496	0.431	0.96	NA	46958	NA
B. distachyon	monocots	ScalHisat	assembler	1	0.984	0.991	37892	25916	57533	3620	1206	843	87.5	0.911	0.901	NA	0.818	0.498	0.503	0.431	0.998	NA	56370	NA
B. distachyon	monocots	ScalStar	assembler	1	0.979	0.993	37892	30740	55350	4741	1206	855	86.6	1	0.893	NA	0.818	0.498	0.503	0.431	0.964	NA	53998	NA
B. distachyon	monocots	BrkProt	abinitio	1	0.828	0.821	37892	40098	43804	16262	1206	843	92.9	0.981	0.359	NA	0.818	0.498	0.359	0.431	NA	NA	NA	NA
B. distachyon	monocots	BrkRNA	abinitio	1	0.871	0.875	37892	36036	37091	10457	1206	798	89.9	0.961	0.279	NA	0.818	0.498	0.279	0.431	NA	NA	NA	NA
B. distachyon	monocots	Braker3	abinitio	1	0.995	0.993	37892	44046	50934	19212	1206	777	86.2	0.841	0.491	NA	0.818	0.498	0.491	0.431	NA	NA	NA	NA
B. distachyon	monocots	TOGA	liftover	1	0.275	0.254	37892	3818	7602	163	1206	1059	97.3	0.996	0.098	NA	0.818	0.498	0.098	0.431	NA	NA	NA	NA
B. distachyon	monocots	liftoff	liftover	1	0.525	0.725	37892	16048	27801	539	1206	980	65.7	0.726	0.422	NA	0.818	0.498	0.308	0.431	NA	NA	NA	NA
B. distachyon	monocots	CGPprotein	abinitio	1	0.972	0.974	37892	29611	29611	5698	1206	966	93.6	0.942	0.456	NA	0.818	0.498	0.456	0.431	NA	NA	NA	NA
B. distachyon	monocots	CGPrnaseq	abinitio	1	0.974	0.981	37892	44562	44562	20992	1206	633	70.5	0.631	0.525	NA	0.818	0.498	0.525	0.431	NA	NA	NA	NA
O. sativa	monocots	StrHisat	assembler	1	0.979	0.998	42578	26037	53883	4031	1215	1047	88.6	0.914	0.843	NA	0.803	0.463	0.471	0.478	0.883	NA	53102	NA
O. sativa	monocots	StrStar	assembler	1	0.976	0.998	42578	25763	56293	3998	1215	1050	88.6	0.914	0.836	NA	0.803	0.463	0.471	0.478	0.878	NA	55577	NA
O. sativa	monocots	ScalHisat	assembler	1	0.979	0.991	42578	32936	69310	4723	1215	873	86.4	0.906	0.853	NA	0.803	0.463	0.48	0.478	1.031	NA	67958	NA
O. sativa	monocots	ScalStar	assembler	1	0.979	0.991	42578	32439	65688	4771	1215	897	86.4	0.903	0.852	NA	0.803	0.463	0.481	0.478	0.986	NA	64491	NA
O. sativa	monocots	BrkProt	abinitio	1	0.866	0.861	42578	38268	41113	11793	1215	900	90.2	0.983	0.376	NA	0.803	0.463	0.376	0.478	NA	NA	NA	NA
O. sativa	monocots	BrkRNA	abinitio	1	0.962	0.965	42578	41553	43911	12117	1215	891	85.4	0.933	0.388	NA	0.803	0.463	0.388	0.478	NA	NA	NA	NA
O. sativa	monocots	Braker3	abinitio	1	1	1	42578	35221	42072	8133	1215	1023	92.5	0.947	0.46	NA	0.803	0.463	0.46	0.478	NA	NA	NA	NA
O. sativa	monocots	TOGA	liftover	1	0.336	0.313	42578	5134	10772	206	1215	1061	97.9	0.998	0.107	NA	0.803	0.463	0.107	0.478	NA	NA	NA	NA
O. sativa	monocots	liftoff	liftover	1	0.487	0.76	42578	17159	29389	651	1215	853	57.9	0.672	0.299	NA	0.803	0.463	0.254	0.478	NA	NA	NA	NA
O. sativa	monocots	CGPprotein	abinitio	1	0.948	0.951	42578	26675	26675	3898	1215	996	93.3	0.951	0.399	NA	0.803	0.463	0.399	0.478	NA	NA	NA	NA
O. sativa	monocots	CGPrnaseq	abinitio	1	0.953	0.965	42578	42292	42292	19223	1215	642	67.7	0.611	0.457	NA	0.803	0.463	0.457	0.478	NA	NA	NA	NA
S. italica	monocots	StrHisat	assembler	1	0.965	0.998	35844	22429	38741	2143	1194	1125	92.4	0.951	0.877	NA	0.793	0.414	0.426	0.379	0.714	NA	38438	NA
S. italica	monocots	StrStar	assembler	1	0.967	1	35844	23006	43640	2402	1194	1107	92.2	0.949	0.856	NA	0.793	0.414	0.424	0.379	0.739	NA	43109	NA
S. italica	monocots	ScalHisat	assembler	1	0.974	0.998	35844	28932	59534	2994	1194	897	89.2	0.937	0.886	NA	0.793	0.414	0.435	0.379	0.987	NA	58159	NA
S. italica	monocots	ScalStar	assembler	1	0.969	0.991	35844	28686	56343	3070	1194	921	89.6	0.936	0.876	NA	0.793	0.414	0.437	0.379	0.843	NA	55106	NA
S. italica	monocots	BrkProt	abinitio	1	0.819	0.821	35844	41993	45196	16364	1194	786	90.7	0.976	0.354	NA	0.793	0.414	0.354	0.379	NA	NA	NA	NA
S. italica	monocots	BrkRNA	abinitio	1	0.795	0.798	35844	37461	38757	10092	1194	795	85.4	0.94	0.284	NA	0.793	0.414	0.284	0.379	NA	NA	NA	NA
S. italica	monocots	Braker3	abinitio	1	0.974	0.976	35844	35282	40843	9320	1194	954	94	0.959	0.404	NA	0.793	0.414	0.404	0.379	NA	NA	NA	NA
S. italica	monocots	TOGA	liftover	1	0.889	0.915	35844	15428	36687	672	1194	1158	98	0.997	0.295	NA	0.793	0.414	0.295	0.379	NA	NA	NA	NA
S. italica	monocots	liftoff	liftover	1	0.755	0.948	35844	20890	35753	1497	1194	1088	72.6	0.82	0.59	NA	0.793	0.414	0.328	0.379	NA	NA	NA	NA
S. italica	monocots	CGPprotein	abinitio	1	0.908	0.908	35844	27243	27243	5989	1194	915	92.1	0.927	0.337	NA	0.793	0.414	0.337	0.379	NA	NA	NA	NA
S. italica	monocots	CGPrnaseq	abinitio	1	0.913	0.918	35844	39228	39228	18588	1194	642	69.6	0.628	0.385	NA	0.793	0.414	0.385	0.379	NA	NA	NA	NA
H. sapiens	mammals	StrHisat	assembler	1	0.791	0.821	124266	16241	46832	1882	1446	1326	92.5	0.961	0.784	0.712	0.599	0.208	0.15	0.936	1.727	26068	46423	56.15319992245223
H. sapiens	mammals	StrStar	assembler	1	0.8	0.827	124266	16076	48624	1679	1446	1380	92.6	0.959	0.786	0.715	0.599	0.208	0.146	0.936	1.743	27379	48457	56.501640629836764
H. sapiens	mammals	ScalHisat	assembler	1	0.807	0.851	124266	23931	75419	5009	1446	849	83.1	0.896	0.793	0.729	0.599	0.208	0.145	0.936	1.911	42602	72783	58.53289916601404
H. sapiens	mammals	ScalStar	assembler	1	0.818	0.856	124266	22969	67695	4670	1446	891	83	0.894	0.795	0.731	0.599	0.208	0.154	0.936	2.044	39361	65927	59.70391493621733
H. sapiens	mammals	BrkProt	abinitio	1	0.511	0.509	124266	34547	37634	11150	1446	675	77.3	0.868	0.097	0.189	0.599	0.208	0.097	0.936	NA	NA	NA	NA
H. sapiens	mammals	BrkRNA	abinitio	1	0.81	0.812	124266	33924	38089	8893	1446	963	83	0.921	0.141	0.271	0.599	0.208	0.141	0.936	NA	NA	NA	NA
H. sapiens	mammals	Braker3	abinitio	1	0.922	0.919	124266	26197	36258	6443	1446	1167	89.1	0.916	0.139	0.297	0.599	0.208	0.139	0.936	NA	NA	NA	NA
H. sapiens	mammals	MakerRnaNoEvm	MAKER	1	0.577	0.569	124266	20825	20825	3293	1446	924	88.8	0.977	0.066	0.166	0.599	0.208	0.066	0.936	NA	NA	NA	NA
H. sapiens	mammals	TOGA	liftover	1	0.992	0.992	124266	23238	79155	2058	1446	1449	96.9	0.999	0.13	0.297	0.599	0.208	0.13	0.936	NA	NA	NA	NA
H. sapiens	mammals	liftoff	liftover	1	0.981	0.997	124266	20550	67035	1816	1446	1515	91.9	0.972	0.648	0.642	0.599	0.208	0.181	0.936	NA	NA	NA	NA
H. sapiens	mammals	CGPprotein	abinitio	1	0.836	0.834	124266	475536	475536	377019	1446	261	26.2	0.296	0.109	0.266	0.599	0.208	0.109	0.936	NA	NA	NA	NA
H. sapiens	mammals	CGPrnaseq	abinitio	1	0.784	0.781	124266	508090	508090	404250	1446	264	26.1	0.288	0.141	0.298	0.599	0.208	0.141	0.936	NA	NA	NA	NA
M. mulatta	mammals	StrHisat	assembler	1	0.799	0.826	68173	15297	47545	1687	1512	1395	94.2	0.966	0.83	NA	0.637	0.344	0.267	0.719	1.754	NA	47332	NA
M. mulatta	mammals	StrStar	assembler	1	0.795	0.823	68173	14575	46800	1284	1512	1452	94.5	0.969	0.836	NA	0.637	0.344	0.252	0.719	1.752	NA	46671	NA
M. mulatta	mammals	ScalHisat	assembler	1	0.836	0.888	68173	29001	73216	7761	1512	798	77.8	0.849	0.859	NA	0.637	0.344	0.262	0.719	2.616	NA	71032	NA
M. mulatta	mammals	ScalStar	assembler	1	0.85	0.894	68173	26616	68861	6921	1512	882	79.4	0.86	0.861	NA	0.637	0.344	0.268	0.719	2.625	NA	67761	NA
M. mulatta	mammals	BrkProt	abinitio	1	0.504	0.502	68173	30022	32625	7834	1512	636	76.7	0.868	0.111	NA	0.637	0.344	0.111	0.719	NA	NA	NA	NA
M. mulatta	mammals	BrkRNA	abinitio	1	0.842	0.843	68173	30534	34422	7231	1512	987	80.6	0.886	0.205	NA	0.637	0.344	0.205	0.719	NA	NA	NA	NA
M. mulatta	mammals	Braker3	abinitio	1	0.933	0.931	68173	23793	33717	5153	1512	1215	89.6	0.906	0.236	NA	0.637	0.344	0.236	0.719	NA	NA	NA	NA
M. mulatta	mammals	TOGA	liftover	1	0.996	0.996	68173	19394	127614	500	1512	1416	97.7	0.998	0.238	NA	0.637	0.344	0.238	0.719	NA	NA	NA	NA
M. mulatta	mammals	liftoff	liftover	1	0.991	0.997	68173	19207	113358	400	1512	1461	92.9	0.975	0.7	NA	0.637	0.344	0.276	0.719	NA	NA	NA	NA
M. mulatta	mammals	CGPprotein	abinitio	1	0.791	0.788	68173	469577	469577	373378	1512	261	25.8	0.291	0.187	NA	0.637	0.344	0.187	0.719	NA	NA	NA	NA
M. mulatta	mammals	CGPrnaseq	abinitio	1	0.72	0.715	68173	480810	480810	379672	1512	261	26.1	0.291	0.211	NA	0.637	0.344	0.211	0.719	NA	NA	NA	NA
C. familiaris	mammals	StrHisat	assembler	0.998	0.796	0.824	66992	15527	48382	1808	1488	1368	93.8	0.961	0.841	NA	0.718	0.299	0.307	0.613	1.566	NA	47997	NA
C. familiaris	mammals	StrStar	assembler	0.998	0.794	0.82	66992	14882	48209	1462	1488	1398	94.2	0.963	0.84	NA	0.718	0.299	0.307	0.613	1.573	NA	47954	NA
C. familiaris	mammals	ScalHisat	assembler	0.998	0.847	0.877	66992	24545	62822	5346	1488	894	81.7	0.853	0.838	NA	0.718	0.299	0.307	0.613	1.875	NA	61131	NA
C. familiaris	mammals	ScalStar	assembler	0.998	0.845	0.877	66992	26000	61852	6470	1488	900	80.9	0.845	0.848	NA	0.718	0.299	0.308	0.613	2.056	NA	60486	NA
C. familiaris	mammals	BrkProt	abinitio	0.998	0.501	0.498	66992	20627	22087	2708	1488	858	81.7	0.955	0.147	NA	0.718	0.299	0.147	0.613	NA	NA	NA	NA
C. familiaris	mammals	BrkRNA	abinitio	0.998	0.763	0.764	66992	25919	29224	4195	1488	1152	79.4	0.895	0.244	NA	0.718	0.299	0.244	0.613	NA	NA	NA	NA
C. familiaris	mammals	Braker3	abinitio	0.998	0.918	0.916	66992	21124	31023	3237	1488	1278	92.7	0.932	0.291	NA	0.718	0.299	0.291	0.613	NA	NA	NA	NA
C. familiaris	mammals	TOGA	liftover	0.998	0.882	0.881	66992	15986	73546	312	1488	1461	97.8	0.998	0.26	NA	0.718	0.299	0.26	0.613	NA	NA	NA	NA
C. familiaris	mammals	liftoff	liftover	0.998	0.853	0.931	66992	17777	108055	405	1488	1415	79.5	0.874	0.67	NA	0.718	0.299	0.269	0.613	NA	NA	NA	NA
C. familiaris	mammals	CGPprotein	abinitio	0.998	0.705	0.702	66992	82621	82621	48457	1488	288	45	0.371	0.213	NA	0.718	0.299	0.213	0.613	NA	NA	NA	NA
C. familiaris	mammals	CGPrnaseq	abinitio	0.998	0.681	0.679	66992	143616	143616	98463	1488	300	36	0.238	0.265	NA	0.718	0.299	0.265	0.613	NA	NA	NA	NA
M. musculus	mammals	StrHisat	assembler	0.999	0.743	0.772	93165	13231	32882	1170	1479	1467	95.2	0.964	0.754	NA	0.692	0.352	0.319	0.893	1.562	NA	32691	NA
M. musculus	mammals	StrStar	assembler	0.999	0.741	0.77	93165	12908	31862	963	1479	1491	95.8	0.971	0.754	NA	0.692	0.352	0.315	0.893	1.561	NA	31680	NA
M. musculus	mammals	ScalHisat	assembler	0.999	0.824	0.88	93165	27757	63421	7115	1479	840	79.6	0.818	0.804	NA	0.692	0.352	0.315	0.893	2.655	NA	62118	NA
M. musculus	mammals	ScalStar	assembler	0.999	0.829	0.882	93165	25823	59809	6150	1479	888	81.4	0.837	0.8	NA	0.692	0.352	0.315	0.893	2.831	NA	58640	NA
M. musculus	mammals	BrkProt	abinitio	0.999	0.684	0.682	93165	27520	29213	5057	1479	795	89.9	0.97	0.224	NA	0.692	0.352	0.224	0.893	NA	NA	NA	NA
M. musculus	mammals	BrkRNA	abinitio	0.999	0.941	0.941	93165	30873	35668	8224	1479	957	86.7	0.873	0.31	NA	0.692	0.352	0.31	0.893	NA	NA	NA	NA
M. musculus	mammals	Braker3	abinitio	0.999	0.941	0.939	93165	22827	31081	4116	1479	1248	94	0.942	0.307	NA	0.692	0.352	0.307	0.893	NA	NA	NA	NA
M. musculus	mammals	TOGA	liftover	0.999	0.993	0.994	93165	17597	115461	275	1479	1437	98.3	0.999	0.3	NA	0.692	0.352	0.3	0.893	NA	NA	NA	NA
M. musculus	mammals	liftoff	liftover	0.999	0.612	0.699	93165	15523	95505	366	1479	884	72.7	0.81	0.524	NA	0.692	0.352	0.263	0.893	NA	NA	NA	NA
M. musculus	mammals	CGPprotein	abinitio	0.999	0.824	0.821	93165	45188	45188	20896	1479	402	61.3	0.543	0.252	NA	0.692	0.352	0.252	0.893	NA	NA	NA	NA
M. musculus	mammals	CGPrnaseq	abinitio	0.999	0.81	0.807	93165	107297	107297	80083	1479	342	39.5	0.254	0.297	NA	0.692	0.352	0.297	0.893	NA	NA	NA	NA
B. mori	heliconines	StrHisat	assembler	NA	0.914	0.961	NA	15950	33808	NA	NA	NA	96.1	NA	0.75	NA	NA	NA	NA	NA	NA	NA	NA	NA
B. mori	heliconines	StrStar	assembler	NA	0.912	0.959	NA	14829	34188	NA	NA	NA	96.6	NA	0.762	NA	NA	NA	NA	NA	NA	NA	NA	NA
B. mori	heliconines	ScalHisat	assembler	NA	0.925	0.96	NA	16672	33686	NA	NA	NA	95	NA	0.755	NA	NA	NA	NA	NA	NA	NA	NA	NA
B. mori	heliconines	ScalStar	assembler	NA	0.917	0.959	NA	17137	32164	NA	NA	NA	94.7	NA	0.759	NA	NA	NA	NA	NA	NA	NA	NA	NA
B. mori	heliconines	BrkProt	abinitio	NA	0.953	0.953	NA	21324	23321	NA	NA	NA	91.8	NA	0.394	NA	NA	NA	0.394	NA	NA	NA	NA	NA
B. mori	heliconines	BrkRNA	abinitio	NA	0.97	0.969	NA	19377	21414	NA	NA	NA	93.5	NA	0.4	NA	NA	NA	0.4	NA	NA	NA	NA	NA
B. mori	heliconines	Braker3	abinitio	NA	0.906	0.903	NA	NA	NA	NA	NA	NA	96.4	NA	0.31	NA	NA	NA	NA	NA	NA	NA	NA	NA
B. mori	heliconines	MakerRnaNoEvm	MAKER	NA	0.874	0.868	NA	12854	12854	NA	NA	NA	94.4	NA	0.282	NA	NA	NA	0.282	NA	NA	NA	NA	NA
B. mori	heliconines	TOGA	liftover	NA	NA	NA	NA	NA	NA	NA	NA	NA	NA	NA	NA	NA	NA	NA	NA	NA	NA	NA	NA	NA
B. mori	heliconines	liftoff	liftover	NA	NA	NA	NA	NA	NA	NA	NA	NA	NA	NA	NA	NA	NA	NA	NA	NA	NA	NA	NA	NA
B. mori	heliconines	CGPprotein	abinitio	NA	NA	NA	NA	NA	NA	NA	NA	NA	NA	NA	NA	NA	NA	NA	NA	NA	NA	NA	NA	NA
B. mori	heliconines	CGPrnaseq	abinitio	NA	NA	NA	NA	NA	NA	NA	NA	NA	NA	NA	NA	NA	NA	NA	NA	NA	NA	NA	NA	NA
H. erato	heliconines	StrHisat	assembler	NA	0.848	0.884	NA	11373	20360	NA	NA	NA	97.8	NA	0.803	NA	NA	NA	NA	NA	NA	NA	NA	NA
H. erato	heliconines	StrStar	assembler	NA	0.848	0.891	NA	10738	21972	NA	NA	NA	97.9	NA	0.806	NA	NA	NA	NA	NA	NA	NA	NA	NA
H. erato	heliconines	ScalHisat	assembler	NA	0.796	0.821	NA	11110	24541	NA	NA	NA	97.5	NA	0.745	NA	NA	NA	NA	NA	NA	NA	NA	NA
H. erato	heliconines	ScalStar	assembler	NA	0.84	0.865	NA	12877	21762	NA	NA	NA	96.9	NA	0.797	NA	NA	NA	NA	NA	NA	NA	NA	NA
H. erato	heliconines	BrkProt	abinitio	NA	0.986	0.986	NA	22520	24988	NA	NA	NA	92.8	NA	0.543	NA	NA	NA	0.543	NA	NA	NA	NA	NA
H. erato	heliconines	BrkRNA	abinitio	NA	0.985	0.984	NA	19112	20198	NA	NA	NA	95.5	NA	0.553	NA	NA	NA	0.553	NA	NA	NA	NA	NA
H. erato	heliconines	Braker3	abinitio	NA	0.985	0.984	NA	NA	NA	NA	NA	NA	96.6	NA	0.527	NA	NA	NA	NA	NA	NA	NA	NA	NA
H. erato	heliconines	MakerRnaNoEvm	MAKER	NA	0.871	0.865	NA	15425	15425	NA	NA	NA	93.5	NA	0.424	NA	NA	NA	0.424	NA	NA	NA	NA	NA
H. erato	heliconines	TOGA	TOGA	NA	NA	NA	NA	NA	NA	NA	NA	NA	NA	NA	NA	NA	NA	NA	NA	NA	NA	NA	NA	NA
H. erato	heliconines	liftoff	liftover	NA	NA	NA	NA	NA	NA	NA	NA	NA	NA	NA	NA	NA	NA	NA	NA	NA	NA	NA	NA	NA
H. erato	heliconines	CGPprotein	abinitio	NA	NA	NA	NA	NA	NA	NA	NA	NA	NA	NA	NA	NA	NA	NA	NA	NA	NA	NA	NA	NA
H. erato	heliconines	CGPrnaseq	abinitio	NA	NA	NA	NA	NA	NA	NA	NA	NA	NA	NA	NA	NA	NA	NA	NA	NA	NA	NA	NA	NA
D. plexippus	heliconines	StrHisat	assembler	NA	0.905	0.969	NA	12467	31308	NA	NA	NA	98.4	NA	0.824	NA	NA	NA	NA	NA	NA	NA	NA	NA
D. plexippus	heliconines	StrStar	assembler	NA	0.912	0.97	NA	12126	35230	NA	NA	NA	98.6	NA	0.82	NA	NA	NA	NA	NA	NA	NA	NA	NA
D. plexippus	heliconines	ScalHisat	assembler	NA	0.906	0.947	NA	13899	40265	NA	NA	NA	97	NA	0.812	NA	NA	NA	NA	NA	NA	NA	NA	NA
D. plexippus	heliconines	ScalStar	assembler	NA	0.917	0.956	NA	15606	30329	NA	NA	NA	96.9	NA	0.822	NA	NA	NA	NA	NA	NA	NA	NA	NA
D. plexippus	heliconines	BrkProt	abinitio	NA	0.99	0.989	NA	21666	24547	NA	NA	NA	92.8	NA	0.391	NA	NA	NA	0.391	NA	NA	NA	NA	NA
D. plexippus	heliconines	BrkRNA	abinitio	NA	0.991	0.991	NA	20913	23304	NA	NA	NA	93	NA	0.398	NA	NA	NA	0.398	NA	NA	NA	NA	NA
D. plexippus	heliconines	Braker3	abinitio	NA	0.968	0.966	NA	15691	23747	NA	NA	NA	95.2	NA	0.367	NA	NA	NA	NA	NA	NA	NA	NA	NA
D. plexippus	heliconines	MakerRnaNoEvm	MAKER	NA	0.935	0.931	NA	10834	10834	NA	NA	NA	97.7	NA	0.32	NA	NA	NA	0.32	NA	NA	NA	NA	NA
D. plexippus	heliconines	TOGA	TOGA	NA	NA	NA	NA	NA	NA	NA	NA	NA	NA	NA	NA	NA	NA	NA	NA	NA	NA	NA	NA	NA
D. plexippus	heliconines	liftoff	liftover	NA	NA	NA	NA	NA	NA	NA	NA	NA	NA	NA	NA	NA	NA	NA	NA	NA	NA	NA	NA	NA
D. plexippus	heliconines	CGPprotein	abinitio	NA	NA	NA	NA	NA	NA	NA	NA	NA	NA	NA	NA	NA	NA	NA	NA	NA	NA	NA	NA	NA
D. plexippus	heliconines	CGPrnaseq	abinitio	NA	NA	NA	NA	NA	NA	NA	NA	NA	NA	NA	NA	NA	NA	NA	NA	NA	NA	NA	NA	NA

## Sheet: ReferenceProteinCoverage
Table S3: part 2. Data for making figures describing reference protein coverage in blastx searches to predicted proteins.
species	group	method	methodtype	refprotein_blastxcoverage_min_0.8	refprotein_blastxcoverage_nominimum
D. melanogaster	dipterans	StrHisat	assembler	0.769541	0.852883
D. melanogaster	dipterans	StrStar	assembler	0.76557	0.851418
D. melanogaster	dipterans	ScalHisat	assembler	0.739656	0.863138
D. melanogaster	dipterans	ScalStar	assembler	0.741218	0.868705
D. melanogaster	dipterans	Maker	maker	0.670769	0.949507
D. melanogaster	dipterans	BrkProt	braker	0.874825	0.966598
D. melanogaster	dipterans	BrkRNA	braker	0.862487	0.967966
D. melanogaster	dipterans	Braker3	braker	0.912133	0.960185
D. melanogaster	dipterans	TOGA	liftover	0.96344	0.983462
D. melanogaster	dipterans	liftoff	liftover	0.955823	0.980955
D. melanogaster	dipterans	CGPprotein	cgp	0.892079	0.977928
D. melanogaster	dipterans	CGPrnaseq	cgp	0.860859	0.977928
D. pseudoobscura	dipterans	StrHisat	assembler	0.705342	0.876648
D. pseudoobscura	dipterans	StrStar	assembler	0.7057	0.872351
D. pseudoobscura	dipterans	ScalHisat	assembler	0.548849	0.85845
D. pseudoobscura	dipterans	ScalStar	assembler	0.573168	0.861868
D. pseudoobscura	dipterans	BrkProt	braker	0.790149	0.945665
D. pseudoobscura	dipterans	BrkRNA	braker	0.779503	0.949995
D. pseudoobscura	dipterans	Braker3	braker	0.837614	0.949767
D. pseudoobscura	dipterans	TOGA	liftover	0.77921	0.912491
D. pseudoobscura	dipterans	liftoff	liftover	0.47153	0.755705
D. pseudoobscura	dipterans	CGPprotein	cgp	0.398118	0.665299
D. pseudoobscura	dipterans	CGPrnaseq	cgp	0.376795	0.665299
D. yakuba	dipterans	StrHisat	assembler	0.79233	0.881011
D. yakuba	dipterans	StrStar	assembler	0.792656	0.879643
D. yakuba	dipterans	ScalHisat	assembler	0.77003	0.888173
D. yakuba	dipterans	ScalStar	assembler	0.768793	0.891819
D. yakuba	dipterans	BrkProt	braker	0.853664	0.962008
D. yakuba	dipterans	BrkRNA	braker	0.851255	0.96585
D. yakuba	dipterans	Braker3	braker	0.908487	0.969658
D. yakuba	dipterans	TOGA	liftover	0.964971	0.990038
D. yakuba	dipterans	liftoff	liftover	0.948986	0.986229
D. yakuba	dipterans	CGPprotein	cgp	0.870332	0.970082
D. yakuba	dipterans	CGPrnaseq	cgp	0.843898	0.970082
A. lyrata	rosids	StrHisat	assembler	0.864871	0.927276
A. lyrata	rosids	StrStar	assembler	0.862841	0.925267
A. lyrata	rosids	ScalHisat	assembler	0.865472	0.930488
A. lyrata	rosids	ScalStar	assembler	0.865928	0.930757
A. lyrata	rosids	BrkProt	braker	0.922408	0.961069
A. lyrata	rosids	BrkRNA	braker	0.919507	0.964053
A. lyrata	rosids	Braker3	braker	0.922428	0.96426
A. lyrata	rosids	TOGA	liftover	0.93747	0.967533
A. lyrata	rosids	liftoff	liftover	0.918202	0.970434
A. lyrata	rosids	CGPprotein	cgp	0.912856	0.960841
A. lyrata	rosids	CGPrnaseq	cgp	0.879664	0.950689
A. thaliana	rosids	StrHisat	assembler	0.858738	0.914804
A. thaliana	rosids	StrStar	assembler	0.859381	0.91613
A. thaliana	rosids	ScalHisat	assembler	0.86197	0.918865
A. thaliana	rosids	ScalStar	assembler	0.861432	0.919901
A. thaliana	rosids	Maker	maker	0.728457	0.860561
A. thaliana	rosids	BrkProt	braker	0.951476	0.96946
A. thaliana	rosids	BrkRNA	braker	0.936061	0.968217
A. thaliana	rosids	Braker3	braker	0.942754	0.967596
A. thaliana	rosids	TOGA	liftover	0.92651	0.961297
A. thaliana	rosids	liftoff	liftover	0.915612	0.962354
A. thaliana	rosids	CGPprotein	cgp	0.957091	0.978142
A. thaliana	rosids	CGPrnaseq	cgp	0.914182	0.964591
B. oleracea	rosids	StrHisat	assembler	0.864933	0.930902
B. oleracea	rosids	StrStar	assembler	0.867482	0.930592
B. oleracea	rosids	ScalHisat	assembler	0.848793	0.924397
B. oleracea	rosids	ScalStar	assembler	0.853973	0.925287
B. oleracea	rosids	BrkProt	braker	NA	NA
B. oleracea	rosids	BrkRNA	braker	0.904672	0.955537
B. oleracea	rosids	Braker3	braker	0.905232	0.954439
B. oleracea	rosids	TOGA	liftover	0.807417	0.900342
B. oleracea	rosids	liftoff	liftover	0.768134	0.907283
B. oleracea	rosids	CGPprotein	cgp	0.709769	0.856708
B. oleracea	rosids	CGPrnaseq	cgp	0.693215	0.853828
C. rubella	rosids	StrHisat	assembler	0.857868	0.924086
C. rubella	rosids	StrStar	assembler	0.856708	0.922843
C. rubella	rosids	ScalHisat	assembler	0.836963	0.915964
C. rubella	rosids	ScalStar	assembler	0.84726	0.919569
C. rubella	rosids	BrkProt	braker	0.915135	0.956324
C. rubella	rosids	BrkRNA	braker	0.911758	0.95879
C. rubella	rosids	Braker3	braker	0.917228	0.960655
C. rubella	rosids	TOGA	liftover	0.911509	0.952305
C. rubella	rosids	liftoff	liftover	0.885404	0.949549
C. rubella	rosids	CGPprotein	cgp	0.893525	0.950088
C. rubella	rosids	CGPrnaseq	cgp	0.869802	0.941883
A. platyrhynchos	birds	StrHisat	assembler	0.791427	0.942486
A. platyrhynchos	birds	StrStar	assembler	0.795325	0.943127
A. platyrhynchos	birds	ScalHisat	assembler	0.763952	0.948156
A. platyrhynchos	birds	ScalStar	assembler	0.776221	0.95062
A. platyrhynchos	birds	BrkProt	braker	0.354215	0.796692
A. platyrhynchos	birds	BrkRNA	braker	0.443203	0.931972
A. platyrhynchos	birds	Braker3	braker	0.822125	0.952139
A. platyrhynchos	birds	TOGA	liftover	0.897123	0.961995
A. platyrhynchos	birds	liftoff	liftover	0.762012	0.929508
A. platyrhynchos	birds	CGPprotein	cgp	0.810159	0.962518
A. platyrhynchos	birds	CGPrnaseq	cgp	0.70956	0.916361
C. japonica	birds	StrHisat	assembler	0.765353	0.940123
C. japonica	birds	StrStar	assembler	0.772542	0.937777
C. japonica	birds	ScalHisat	assembler	0.737575	0.950688
C. japonica	birds	ScalStar	assembler	0.762535	0.955447
C. japonica	birds	BrkProt	braker	0.458358	0.868298
C. japonica	birds	BrkRNA	braker	0.657767	0.969252
C. japonica	birds	Braker3	braker	0.849481	0.963463
C. japonica	birds	TOGA	liftover	0.925694	0.973285
C. japonica	birds	liftoff	liftover	0.888718	0.976812
C. japonica	birds	CGPprotein	cgp	0.810159	0.962518
C. japonica	birds	CGPrnaseq	cgp	0.800709	0.96721
G. gallus	birds	StrHisat	assembler	0.814665	0.941372
G. gallus	birds	StrStar	assembler	0.813737	0.939904
G. gallus	birds	ScalHisat	assembler	0.819155	0.964492
G. gallus	birds	ScalStar	assembler	0.819019	0.96748
G. gallus	birds	Maker	maker	0.726825	0.95386
G. gallus	birds	BrkProt	braker	0.461936	0.859016
G. gallus	birds	BrkRNA	braker	0.536596	0.962417
G. gallus	birds	Braker3	braker	0.894102	0.975732
G. gallus	birds	TOGA	liftover	0.887942	0.962906
G. gallus	birds	liftoff	liftover	0.862358	0.956442
G. gallus	birds	CGPprotein	cgp	0.846663	0.976863
G. gallus	birds	CGPrnaseq	cgp	0.843152	0.979732
Z. mays	monocots	StrHisat	assembler	0.879173	0.961322
Z. mays	monocots	StrStar	assembler	0.882229	0.960037
Z. mays	monocots	ScalHisat	assembler	0.876376	0.963719
Z. mays	monocots	ScalStar	assembler	0.880093	0.961357
Z. mays	monocots	Maker	maker	0.764962	0.909254
Z. mays	monocots	BrkProt	braker	0.716402	0.940203
Z. mays	monocots	BrkRNA	braker	0.800792	0.980826
Z. mays	monocots	Braker3	braker	0.925527	0.976571
Z. mays	monocots	TOGA	liftover	0.767741	0.894456
Z. mays	monocots	liftoff	liftover	0.700545	0.89232
Z. mays	monocots	CGPprotein	cgp	0.698739	0.9067
Z. mays	monocots	CGPrnaseq	cgp	0.663048	0.898711
B. distachyon	monocots	StrHisat	assembler	0.783911	0.920299
B. distachyon	monocots	StrStar	assembler	0.785369	0.92155
B. distachyon	monocots	ScalHisat	assembler	0.762618	0.918528
B. distachyon	monocots	ScalStar	assembler	0.769026	0.919362
B. distachyon	monocots	BrkProt	braker	0.655163	0.897339
B. distachyon	monocots	BrkRNA	braker	0.545816	0.908906
B. distachyon	monocots	Braker3	braker	0.820522	0.940898
B. distachyon	monocots	TOGA	liftover	0.355761	0.624978
B. distachyon	monocots	liftoff	liftover	0.4711	0.798169
B. distachyon	monocots	CGPprotein	cgp	0.757772	0.936677
B. distachyon	monocots	CGPrnaseq	cgp	0.78728	0.93145
O. sativa	monocots	StrHisat	assembler	0.795165	0.928671
O. sativa	monocots	StrStar	assembler	0.795147	0.928619
O. sativa	monocots	ScalHisat	assembler	0.792785	0.934923
O. sativa	monocots	ScalStar	assembler	0.792785	0.933099
O. sativa	monocots	BrkProt	braker	0.676144	0.911563
O. sativa	monocots	BrkRNA	braker	0.658498	0.937493
O. sativa	monocots	Braker3	braker	0.823735	0.946368
O. sativa	monocots	TOGA	liftover	0.416496	0.687537
O. sativa	monocots	liftoff	liftover	0.377471	0.797996
O. sativa	monocots	CGPprotein	cgp	0.754403	0.934419
O. sativa	monocots	CGPrnaseq	cgp	0.773038	0.928566
S. italica	monocots	StrHisat	assembler	0.801435	0.925683
S. italica	monocots	StrStar	assembler	0.802963	0.928028
S. italica	monocots	ScalHisat	assembler	0.791274	0.927333
S. italica	monocots	ScalStar	assembler	0.79315	0.929053
S. italica	monocots	BrkProt	braker	0.672253	0.907135
S. italica	monocots	BrkRNA	braker	0.510942	0.905884
S. italica	monocots	Braker3	braker	0.836587	0.945587
S. italica	monocots	TOGA	liftover	0.75805	0.898173
S. italica	monocots	liftoff	liftover	0.680937	0.901907
S. italica	monocots	CGPprotein	cgp	0.742193	0.927577
S. italica	monocots	CGPrnaseq	cgp	0.765918	0.922349
H. sapiens	mammals	StrHisat	assembler	0.821715	0.945245
H. sapiens	mammals	StrStar	assembler	0.830875	0.946234
H. sapiens	mammals	ScalHisat	assembler	0.804151	0.960314
H. sapiens	mammals	ScalStar	assembler	0.815548	0.960882
H. sapiens	mammals	Maker	maker	0.565666	0.892846
H. sapiens	mammals	BrkProt	braker	0.494414	0.882611
H. sapiens	mammals	BrkRNA	braker	0.693996	0.970739
H. sapiens	mammals	Braker3	braker	0.885398	0.977362
H. sapiens	mammals	TOGA	liftover	0.940961	0.993196
H. sapiens	mammals	liftoff	liftover	0.935259	0.992087
H. sapiens	mammals	CGPprotein	cgp	0.692129	0.994693
H. sapiens	mammals	CGPrnaseq	cgp	0.619079	0.991992
M. mulatta	mammals	StrHisat	assembler	0.819272	0.93962
M. mulatta	mammals	StrStar	assembler	0.81867	0.938605
M. mulatta	mammals	ScalHisat	assembler	0.814997	0.963196
M. mulatta	mammals	ScalStar	assembler	0.834849	0.966498
M. mulatta	mammals	BrkProt	braker	0.486707	0.879936
M. mulatta	mammals	BrkRNA	braker	0.721287	0.977353
M. mulatta	mammals	Braker3	braker	0.886843	0.978729
M. mulatta	mammals	TOGA	liftover	0.985473	0.996818
M. mulatta	mammals	liftoff	liftover	0.969311	0.997058
M. mulatta	mammals	CGPprotein	cgp	0.656073	0.985868
M. mulatta	mammals	CGPrnaseq	cgp	0.557701	0.98149
C. familiaris	mammals	StrHisat	assembler	0.801029	0.943215
C. familiaris	mammals	StrStar	assembler	0.80004	0.942811
C. familiaris	mammals	ScalHisat	assembler	0.804719	0.963436
C. familiaris	mammals	ScalStar	assembler	0.808245	0.962103
C. familiaris	mammals	BrkProt	braker	0.488685	0.860936
C. familiaris	mammals	BrkRNA	braker	0.646138	0.960383
C. familiaris	mammals	Braker3	braker	0.859534	0.971909
C. familiaris	mammals	TOGA	liftover	0.917678	0.982187
C. familiaris	mammals	liftoff	liftover	0.808512	0.959093
C. familiaris	mammals	CGPprotein	cgp	0.626055	0.951558
C. familiaris	mammals	CGPrnaseq	cgp	0.608551	0.951137
M. musculus	mammals	StrHisat	assembler	0.768224	0.91545
M. musculus	mammals	StrStar	assembler	0.766684	0.915158
M. musculus	mammals	ScalHisat	assembler	0.794715	0.950741
M. musculus	mammals	ScalStar	assembler	0.800925	0.952685
M. musculus	mammals	BrkProt	braker	0.582017	0.927767
M. musculus	mammals	BrkRNA	braker	0.806473	0.980957
M. musculus	mammals	Braker3	braker	0.865684	0.971891
M. musculus	mammals	TOGA	liftover	0.924447	0.986952
M. musculus	mammals	liftoff	liftover	0.64133	0.886146
M. musculus	mammals	CGPprotein	cgp	0.74974	0.960976
M. musculus	mammals	CGPrnaseq	cgp	0.730981	0.959686
