# Supplementary material for: Building better genome annotations across the tree of life
Source: HighWire-hosted journal article supplement (doi:10.1101/gr.280377.124), 2025-04-15
Supplement: Supplemental_Table_S4.xlsx [file Supplemental_Table_S4.xlsx]

## Sheet: Sheet1
Table S4.Performance metrics, statistics, genomic compartment, software and scripts used to generate statistics. All referenced python scripts can be found at https://github.com/harvardinformatics/GenomeAnnotation/tree/master/GenomeResearch/python_scripts.
Performance metric	Statistic	Genomic compartment	Software	Python scripts
genome completeness	1-# missing BUSCOs/# BUSCOs searched	genome	compleasm	None
annotation completeness	1-# missing BUSCOs/# BUSCOs searched	proteome	compleasm	None
annotation completeness	1-# missing BUSCOs/# BUSCOs searched	transcriptome	compleasm	None
CDS length	median CDS length	proteome	None	GenerateFastaSeqLengthTable.py
intergenic false positive rate	# predicted genes outside NCBI CDS intervals/total # predicted genes	proteome	bedtools: intersectBed	WriteBrakerCdsTranscriptAndGeneIntervalBedFilesWithNoUTRs.py or WriteTransdecoderCdsTranscriptAndGeneIntervalBedFiles.py; CalcGeneUniqueToMethodClassRate.py
Proteome accuracy	Proportion of reference proteins with >=80% (or <80%) coverage by blastp alignments to predicte proteins	proteome	blastp	CalculateBlastpFractionRefProteinsCovered.py
Proteome accuracy	annotation Psauron score	proteome	Psauron	None
Expressed transcriptome recovery	median RNA-seq alignment rate across samples within species	transcriptome	RSEM	GetMedianAnnotationAlignRate.py
Expressed transcriptome recovery	median RNA-seq alignment rate across samples within species	proteome	RSEM	GetMedianAnnotationAlignRate.py
Undetected CDS in predicted UTRs	proportion of transcripts with UTRs having a blastx hit to protein database	RNA-seq assembler UTR	blastx	GenerateFastaSeqLengthTable.py, CalculateTotalUtrLengthFromUtrBed.py, BuildUtrCdsRatioTable.py
