# Supplementary material for: Building better genome annotations across the tree of life
Source: HighWire-hosted journal article supplement (doi:10.1101/gr.280377.124), 2025-04-15
Supplement: Supplemental_Table_S5.xlsx [file Supplemental_Table_S5.xlsx]

## Sheet: Sheet1
Table S5.Genome annotation tools used and input data provided
Annotation tool	Input data	Output format	CDS prediction	UTR and ncRNA prediction	Notes
BRAKER1	soft-masked genome fasta; RNA-seq alignments (bam)	gtf	Yes	No
BRAKER2	soft-masked genome fasta; orthodb protein database (fasta format)	gtf	Yes	No
BRAKER3	soft-masked genome fasta; RNA-seq alignments (bam); orthodb protein fasta	gtf	Yes	No
CGP-protein	genome fastas of species; newick format tree; whole-genome alignment in maf format; splice hints generated from protein alignments	gff3	Yes	No	Requires a number of steps to generate splice hints before execution of CGP
CGP-RNAseq	genome fastas of species; newick format tree; whole-genome alignment in maf format; splice hints generated from rna-seq alignments	gff3	Yes	No	Requires a number of steps to generate splice hints before execution of CGP
MAKER	genome fasta: protein database (fasta format) from closely related species; RNA-seq transcript assembly in gff3 format	gff3	Yes	No
Stringtie	RNA-seq spliced read alignments to genome	gtf	No	No
Scallop	RNA-seq spliced read alignments to genome	gtf	No	No
Transdecoder	RNA-seq assembler (e.g. Stringtie or Scallop) transcript fasta and annotation gtf	gff3	Yes	Yes	Filters out transcripts without ORF predictions, so requires an accesory script (see methods) to add those back into the final annotation
TOGA	whole genome alignment of reference and target genomes; reference annotation	gff3	Yes	No
Liftoff	reference genome fasta; reference annotation (gff3); target genome fasta	gff3	Yes	Yes
